## 1 Title

2 **HiC-bench: comprehensive and reproducible Hi-C data analysis designed for**  
3 **parameter exploration and benchmarking**

## 4 Authors

5 Charalampos Lazaris<sup>1,2,3</sup>, Stephen Kelly<sup>4,5</sup>, Panagiotis Ntziachristos<sup>6</sup>, Iannis Aifantis<sup>1,2\*</sup> and  
6 Aristotelis Tsirigos<sup>1,2,3,4,5\*</sup>

- 7
- 8 1. Department of Pathology, NYU School of Medicine, New York, NY 10016, USA
  - 9 2. Laura and Isaac Perlmutter Cancer Center and Helen L. and Martin S. Kimmel Center for  
10 Stem Cell Biology, NYU School of Medicine, New York, NY 10016, USA
  - 11 3. Center for Health Informatics & Bioinformatics, NYU School of Medicine, NY 10016, USA
  - 12 4. Applied Bioinformatics Center, Office of Science & Research, NYU School of Medicine, NY  
13 10016, USA
  - 14 5. Genome Technology Center, Office of Science & Research, NYU School of Medicine, NY  
15 10016, USA
  - 16 6. Department of Biochemistry and Molecular Genetics, Feinberg School of Medicine,  
17 Northwestern University, Chicago, IL 60611, USA
- 18

## 19 E-mail addresses

20 charalampos.lazaris@med.nyu.edu  
21 stephen.kelly@nyumc.org  
22 panos.ntz@northwestern.edu  
23 ioannis.aifantis@nyumc.org  
24 aristotelis.tsirigos@nyumc.org

25

26 \* Address correspondence to: Aristotelis Tsirigos (AT) ([aristotelis.tsirigos@nyumc.org](mailto:aristotelis.tsirigos@nyumc.org)) or  
27 Iannis Aifantis (IA) ([ioannis.aifantis@nyumc.org](mailto:ioannis.aifantis@nyumc.org))  
28

## 29 Abstract

30 Chromatin conformation capture techniques have evolved rapidly over the last few years  
31 and have provided new insights into genome organization at an unprecedented  
32 resolution. Analysis of Hi-C data is complex and computationally intensive involving  
33 multiple tasks and requiring robust quality assessment at each step of the analysis. This  
34 has led to the development of several tools and methods for processing Hi-C data.  
35 However, most of the existing tools do not cover all aspects of the analysis and only offer  
36 few quality assessment options. Additionally, availability of a multitude of tools makes

37 scientists wonder how these tools and associated parameters can be optimally used, and  
38 how potential discrepancies can be interpreted and resolved. Most importantly,  
39 investigators need to be ensured that slight changes in parameters and/or methods do  
40 not affect the conclusions of their studies. Finally, any analysis, no matter how complex,  
41 should be reproducible by keeping track of the tool versions, parameters and input data.  
42 To address these issues (compare, explore and reproduce), we introduce HiC-bench, a  
43 configurable computational platform for comprehensive and reproducible analysis of Hi-  
44 C sequencing data. HiC-bench performs all common Hi-C analysis tasks, such as  
45 alignment, filtering, contact matrix generation and normalization, identification of  
46 topological domains, scoring and annotation of specific interactions using both published  
47 tools and our own. We have also embedded various tasks that perform quality  
48 assessment and visualization. HiC-bench is implemented as a data flow platform with an  
49 emphasis on analysis reproducibility. Additionally, the user can readily perform parameter  
50 exploration and comparison of different tools in a combinatorial manner that takes into  
51 account all desired parameter settings in each pipeline task. This unique feature facilitates  
52 the design and execution of complex benchmark studies that may involve combinations  
53 of multiple tool/parameter choices in each step of the analysis. To demonstrate the  
54 usefulness of our platform, we performed a comprehensive benchmark of existing and  
55 new TAD callers exploring different matrix correction methods, parameter settings and  
56 sequencing depths. Users can extend our pipeline by adding more tools as they become  
57 available. HiC-bench is distributed as free open-source software on GitHub and Zenodo,  
58 and our bioinformatics team offers installation and usage support.

59

60 **Keywords**

61 Hi-C, Chromosome Conformation, Computational pipeline, Data provenance, Parameter  
62 exploration, Benchmarking

63

## 64 **Background**

65 Nuclear organization is of fundamental importance to gene regulation. Over the last  
66 decade, proximity ligation assays have greatly enhanced our understanding of chromatin  
67 organization and its relationship to gene expression [1]. Here we focus on Hi-C, a powerful  
68 genome-wide chromosome conformation capture variant, which detects genome-wide  
69 chromatin interactions [2,3]. In Hi-C, chromatin is cross-linked and DNA is fragmented  
70 using restriction enzymes, the interacting fragments are ligated forming hybrids that are  
71 then sequenced and mapped back to the genome. Hi-C is a very powerful technique that  
72 has led to important discoveries regarding the organizational principles of the genome.  
73 More specifically, Hi-C has revealed that the mammalian genome is organized in active  
74 and repressed areas (A and B compartments) [2] that are further divided in “meta-TADs”  
75 [4], TADs [5] and sub-TADs [6]. TADs consist evolutionarily conserved, megabase-scale,  
76 non-overlapping areas with increased frequency of intra-domain compared to inter-  
77 domain chromatin interactions [5,7]. Despite the fact that Hi-C is very powerful, it is known  
78 to be prone to systematic biases [8-10]. Moreover, as the sequencing costs plummet  
79 allowing for increased Hi-C resolution, Hi-C poses formidable challenges to computational  
80 analysis in terms of data storage, memory usage and processing speed. Thus, various  
81 tools have been recently developed to mitigate biases in Hi-C data and make Hi-C  
82 analysis faster and more efficient in terms of resource usage. HiC-Box [11], hiclib [9] and  
83 HiC-Pro [12] perform various Hi-C analysis tasks, such as alignment and binning of Hi-C

84 sequencing reads into Hi-C contact matrices, noise reduction and detection of specific  
85 DNA-DNA interactions. Hi-Corrector [13] has been developed for noise reduction of Hi-C  
86 data, allowing parallelization and effective memory management, whereas Hi-Cpipe [14]  
87 offers parallelization options and includes steps for alignment, filtering, quality control,  
88 detection of specific interactions and visualization of contact matrices. Other tools that  
89 allow parallelization are HiFive [15], HOMER [16] and HiC-Pro [12]. Allele-specific Hi-C  
90 contact maps can be generated using HiC-Pro and HiCUP [17] (with SNPsplit [18]).  
91 TADbit can be used to map raw reads, create interaction matrices, normalize and correct  
92 the matrices, call topological domains and build three-dimensional (3D) models based on  
93 the Hi-C matrices [19]. HiCdat performs binning, matrix normalization, integration of other  
94 data (e.g. ChIP-seq) and visualization [20]. HIPPIE offers similar functionality with HiCdat  
95 and allows detection of specific enhancer-promoter interactions [21]. Other tools mainly  
96 focus on visualization of Hi-C data (e.g. Sushi [22] and HiCPlotter [23]). Despite the recent  
97 boom in the development of computational methods for Hi-C analysis, most of these tools  
98 only focus on certain aspects of the analysis, thus failing to encompass the entire Hi-C  
99 data analysis workflow. More importantly, these tools or pipelines are not extensible, and,  
100 for any given Hi-C task, they do not allow the integration of multiple alternative tools (use  
101 of alternative TAD calling methods for example) whose performance could then be  
102 qualitatively or quantitatively compared. Available tools do not support comprehensive  
103 reporting of the parameters used for each task and they do not enable reproducible  
104 computational analysis which is an imperative requirement in the era of big data [24],  
105 especially given the complexity of Hi-C analyses. The recently released HiFive is an

106 exception as it offers a Galaxy interface [15]. However, use of Galaxy [25] can become  
107 problematic for data-heavy analyses, especially when the remote Galaxy server is used.  
108 To facilitate comprehensive processing, reproducibility, parameter exploration and  
109 benchmarking of Hi-C data analyses, we introduce HiC-bench, a data flow platform which  
110 is extensible and allows the integration of different task-specific tools. Current and future  
111 tools related to Hi-C analysis can be easily incorporated into HiC-bench by implementing  
112 simple wrapper scripts. HiC-bench covers all current aspects of a standard Hi-C analysis  
113 workflow, including read mapping, filtering, quality control, binning, noise correction and  
114 identification of specific interactions (**Table 1**). Moreover, it integrates multiple alternative  
115 tools for performing each task (such as matrix correction tools and TAD-calling  
116 algorithms), while at the same time allowing simultaneous exploration of different  
117 parameter settings that are propagated from one task to all subsequent tasks in the  
118 pipeline. HiC-bench also generates a variety of quality assessment plots and offers other  
119 visualization options, such as generating genome browser tracks as well as snapshots  
120 using HiCPlotter. We have built this platform with reproducibility in mind, as all tools,  
121 versions and parameter settings are recorded throughout the analysis. HiC-bench is  
122 released as open-source software and the source code is available on GitHub and  
123 Zenodo (for details please refer to “Availability of data and material” section). Our team  
124 provides installation and usage support.

125

## 126 **Methods**

### 127 **The HiC-bench workflow**

128 HiC-bench is a comprehensive computational pipeline for Hi-C sequencing data analysis.  
129 It covers all aspects of Hi-C data analysis, ranging from alignment of raw reads to  
130 boundary-score calculation, TAD calling, boundary detection, annotation of specific  
131 interactions and enrichment analysis. Thus, HiC-bench consists the most complete  
132 computational Hi-C analysis pipeline to date (**Table 1**). Importantly, every step of the  
133 pipeline includes summary statistics (when applicable) and direct comparative  
134 visualization of the results. This feature is essential for quality control and facilitates  
135 troubleshooting. The HiC-bench workflow (**Figure 1**) starts with the alignment of Hi-C  
136 sequencing reads and ends with the annotation and enrichment of specific interactions.  
137 More specifically, in the first step, the raw reads (fastq files) are aligned to the reference  
138 genome using Bowtie2 [26] (*align*). The aligned reads are further filtered in order to  
139 determine those Hi-C read pairs that will be used for downstream analysis (*filter*). A  
140 detailed statistics report showing the numbers and percentages of reads assigned to the  
141 different categories is automatically generated in the next step (*filter-stats*). The reads  
142 that satisfy the filtering criteria are used for the creation of Hi-C contact matrices (*matrix-*  
143 *filtered*). These contact matrices can either be directly visualized in the WashU  
144 Epigenome Browser [27] as Hi-C tracks (*tracks*), or further processed using three  
145 alternative matrix correction methods: (a) matrix scaling (*matrix-prep*), (b) iterative  
146 correction (*matrix-ic*) [9] and (c) HiCNorm (*matrix-hicnorm*) [28]. As quality control, plots  
147 of the average number of Hi-C interactions as a function of the distance between the  
148 interacting loci are automatically generated in the next step (*matrix-stats*). The Hi-C  
149 matrices, before and after matrix correction, are used as inputs in various subsequent  
150 pipeline tasks. First, they are directly compared in terms of Pearson or Spearman

151 correlation (*compare-matrices* and *compare-matrices-stats*) in order to estimate the  
152 similarity between Hi-C samples. Second, they are used for the calculation of boundary  
153 scores (*boundary-scores* and *boundary-scores-pca*), identification of topological domains  
154 (*domains*) and comparison of boundaries (*compare-boundaries* and *compare-*  
155 *boundaries-stats*). Third, high-resolution Hi-C matrices are used for detection and  
156 annotation of specific chromatin interactions (*interactions* and *annotations*), enrichment  
157 analysis in transcription factors, chromatin marks or other segmented data (*annotation-*  
158 *stats*) and visualization of chromatin interactions in certain genomic loci of interest  
159 (*hicplotter*). We should note here that HiC-bench is totally extensible and customizable  
160 as new tools can be easily integrated into the HiC-bench workflow (see User Manual for  
161 more details). In addition to the multiple alternative tools that can be used to perform  
162 certain tasks, HiC-bench allows simultaneous exploration of different parameter settings  
163 that are propagated from one task to all subsequent tasks in the pipeline (for details  
164 please refer to “Main concepts and pipeline architecture” section). For example, after  
165 contact matrices are generated and corrected using alternative methods, HiC-bench  
166 proceeds with TAD calling using all computed matrices as inputs (**Figure 1** and **Figure**  
167 **2A**). This unique feature enables the design and execution of complex benchmark studies  
168 that may include combinations of multiple tool/parameter choices in each step. HiC-bench  
169 focuses on the reproducibility of the analysis by keeping records of the source code, tool  
170 versions and parameter settings, and it is the only HiC-analysis pipeline that allows  
171 combinatorial parameter exploration facilitating benchmarking of Hi-C analyses.

172

173 **Table 1. Comparison of HiC-bench with published Hi-C analysis or visualization tools.**

|                                  | HiC-bench | HiFive | Hi-Cpipe | HiCNorm | hiclib | HiTC | HOMER | Hi-Corrector | HiC-Pro | TADbit | HiCUP | HiC-Box | HiCdat | HIPPIE | Sushi | HiCPlotter |
|----------------------------------|-----------|--------|----------|---------|--------|------|-------|--------------|---------|--------|-------|---------|--------|--------|-------|------------|
| <b>Hi-C tasks</b>                |           |        |          |         |        |      |       |              |         |        |       |         |        |        |       |            |
| alignment                        | x         |        | x        |         | x      |      |       |              | x       | x      | x     | x       |        | x      |       |            |
| filtering                        | x         | x      | x        |         | x      |      |       |              | x       | x      | x     | x       |        | x      |       |            |
| genome browser tracks            | x         |        |          |         |        |      |       |              |         |        |       |         |        |        |       |            |
| quality assessment plots         | x         | x      | x        |         |        | x    |       |              | x       |        | x     |         | x      | x      |       |            |
| contact matrices                 | x         | x      | x        |         | x      |      | x     |              | x       |        |       | x       | x      |        |       |            |
| matrix correction                | x         | x      |          | x       | x      | x    | x     | x            | x       | x      |       | x       | x      |        |       |            |
| matrix comparison                | x         |        |          |         |        |      |       |              |         |        |       |         | x      |        |       |            |
| boundary scores                  | x         |        |          |         |        |      |       |              |         |        |       |         |        |        |       |            |
| domains                          | x         |        |          |         |        |      |       |              |         | x      |       |         |        |        |       |            |
| boundary comparison              | x         |        |          |         |        |      |       |              |         |        |       |         |        |        |       |            |
| specific interactions            | x         |        | x        |         | x      |      | x     |              | x       |        | x     | x       | x      | x      |       |            |
| annotations                      | x         |        |          |         |        | x    |       |              |         |        |       |         | x      |        |       |            |
| allele-specific interactions     |           |        |          |         |        |      |       |              | x       |        | x     |         |        |        |       |            |
| visualization                    | x         | x      | x        |         |        | x    | x     |              |         |        |       |         | x      |        | x     | x          |
| integration with ChIP-seq data   | x         |        |          |         |        |      |       |              |         |        |       |         | x      | x      |       |            |
| parallelization                  | x         | x      | x        |         |        |      | x     | x            | x       | x      |       |         |        |        |       |            |
| integration of alternative tools | x         |        |          |         |        |      |       |              |         |        |       |         |        |        |       |            |
| parameter exploration            | x         |        |          |         |        |      |       |              |         |        |       |         |        |        |       |            |
| reproducibility                  | x         | x      |          |         |        |      |       |              |         |        |       |         |        |        |       |            |

174

## 175 **The HiC-bench toolkit**

176 HiC-bench performs various tasks of Hi-C analysis ranging from read alignment to  
 177 annotation of specific interactions and visualization. We have developed two new tools,  
 178 *gtools-hic* and *hic-matrix*, to execute the multiple tasks in the HiC-bench pipeline, but we  
 179 have also integrated existing tools to allow comparative and complementary analyses and



180 facilitate benchmarking. More specifically, the alignment task is performed either with  
181 Bowtie2 [26] or with the “align” function of *gtools-hic*, our newest addition to  
182 GenomicTools [29]. Likewise, filtering, creation of Hi-C tracks and generation of Hi-C  
183 contact matrices are performed using the functions “filter”, “bin/convert” and “matrix” of  
184 *gtools-hic* respectively. For advanced users, we have implemented a series of novel  
185 features for these common Hi-C analysis tasks. For example, the operation “matrix” of  
186 *gtools-hic* allows generation of arbitrary chimeric Hi-C contact matrices, a feature  
187 particularly useful for the study of the effect of chromosomal translocations on chromatin  
188 interactions. Another example is the generation of distance-restricted matrices (up to  
189 some maximum distance off the diagonal) in order to save storage space and reduce  
190 memory usage at fine resolutions. For matrix correction we use either published  
191 algorithms (iterative correction (IC/ICE) [9], HiCNorm [28]) or our “naïve scaling” method  
192 where we divide the Hi-C counts by (a) the total number of (usable) reads, and (b) the  
193 “effective length” [8,28] of each genomic bin. We also integrated published TAD callers  
194 like DI [5], Armatus [30], TopDom [31], insulation index (Crane) [32] and our own TAD  
195 calling method (similar but not identical to contrast index [33,34]) implemented as the  
196 “domains” operation in *hic-matrix*. Additionally, the “domains” operation produces  
197 genome-wide boundary scores using multiple methods and allowing flexibility in choosing  
198 parameters. Boundaries are simply defined as local maxima of the boundary scores. For  
199 the detection of specific interactions, we introduce the “loops” function of *hic-matrix*, while  
200 GenomicTools is used for annotation of these interactions with gene names, ChIP-seq  
201 and other user-defined data. Finally, we implemented a wrapper for HiCPlotter, taking  
202 advantage of its advanced visualization features in order to allow the user to quickly

203 generate snapshots of areas of interest in batch. The HiC-bench toolkit is summarized in  
204 **Table 2**. All the tools we developed appear in bold. Further information on the toolkit is  
205 provided in the User Manual found online and in the Supplemental Information section.

206  
207 **Table 2. The HiC-bench toolkit.** The HiC-bench toolkit consists mostly of newly-developed tools  
208 (shown in bold) but we have also incorporated existing tools to allow comparisons and  
209 benchmarking.

| Hi-C tasks            | HiC-bench toolkit                                    |
|-----------------------|------------------------------------------------------|
| alignment             | bowtie2, <b>gtools-hic[align]</b>                    |
| filtering             | <b>gtools-hic[filter]</b>                            |
| genome browser tracks | <b>gtools-hic[bin/convert]</b>                       |
| matrix generation     | <b>gtools-hic[matrix]</b>                            |
| matrix correction     | IC, HiCNorm, <b>hic-matrix[preprocess/normalize]</b> |
| boundary scores       | <b>hic-matrix[domains]</b>                           |
| domain calling        | DI, Armatus, TopDom, <b>hic-matrix[domains]</b>      |
| interactions          | <b>hic-matrix[loops]</b>                             |
| annotations           | <b>genomic-tools</b>                                 |
| visualization         | HiCPlotter                                           |

210  
211 **Main concepts and pipeline architecture**

212 We built our platform based on principles outlined in scientific workflow systems such as  
213 Kepler [35], Taverna [36] and VisTrails [37]. The main idea behind our platform is the  
214 ability to track data provenance [37,38], the origin of the data, computational tasks, tool  
215 versions and parameter settings used in order to generate a certain output (or collection  
216 of outputs) from a given input (or collection of inputs). Thus, our pipeline ensures  
217 reproducibility which is a particularly important feature for such a complex computational  
218 task. In addition, HiC-bench enables combinatorial analysis and parameter exploration by  
219 implementing the idea of computational “trails”: a unique combination of inputs, tools and  
220 parameter values can be imagined as a unique (computational) trail that is followed  
221 simultaneously with all the other possible trails in order to generate a collection of output

222 objects (**Figure 2A**). Our platform consists of three main components: (a) data, (b) code  
223 and (c) pipelines. These components are organized in respective directories in our local  
224 repository, and synchronized with a remote GitHub repository for public access. The data  
225 directory is used to store data that would be used by any analysis, for example genome-  
226 related data, such as DNA sequences and indices (e.g. Bowtie2), gene annotations and,  
227 in general, any type of data that is required for the analysis. The code directory is used to  
228 store scripts, source code and executables. More details about the directory structure can  
229 be found in the User Manual. Finally, the “pipelines” directory is used to store the structure  
230 of each pipeline. Here, we will focus on our Hi-C pipeline, but we have also implemented  
231 a ChIP-seq pipeline, which is very useful for integrating CTCF and histone modification  
232 ChIP-seq data with Hi-C data. The structure of the pipeline is presented to the user as a  
233 numbered list of directories, each one corresponding to one operation (or task) of the  
234 pipeline. As shown in **Figure 1**, our Hi-C pipeline currently consists of several tasks  
235 starting with alignment and reaching completion with the identification and annotation of  
236 specific DNA-DNA interactions and annotations with ChIP-seq and other genome-wide  
237 data (see also **Table 2** and **Supplemental Table 1**). We will examine these tasks in detail  
238 in the Results section of this manuscript.

## 239 240 **Parameter exploration, input and output objects**

241 In conventional computational pipelines, several computational tasks (operations) are  
242 executed on their required inputs. However, in existing genomics pipelines, each task  
243 generates a single result object (e.g. TAD calling using one method with fixed parameter  
244 settings) which is then used by downstream tasks. To allow full parameter (and  
245 method/tool) exploration, we introduce instead a data flow model, where every task may

246 accommodate an arbitrary number of output objects. Downstream tasks will then operate  
247 on all computed objects generated by the tasks they depend on. Pipeline tasks are  
248 implemented as shown in the diagram of **Figure 2B**. First, input objects are filtered  
249 according to user-specified criteria (e.g. TAD calling is only done for Hi-C contact matrices  
250 at 40kb resolution). Then, *pipeline-master-explorer* (implemented as an R script; see User  
251 Manual for usage and input arguments) generates the commands that create all desired  
252 output objects. In principle, all combinations of input objects with all parameter settings  
253 will be created, subject to user-defined filtering criteria. In the interest of extensibility, new  
254 pipeline tasks can be conveniently implemented using a single-line *pipeline-master-*  
255 *explorer* command (see **Supplemental Table 2**), provided that wrapper scripts for each  
256 task (e.g. TAD calling using TopDom) have been properly set up. In the simplest scenario,  
257 any task in our pipeline will generate computational objects for each combination of  
258 parameter file and input objects obtained from upstream tasks. For example, suppose the  
259 aligned reads from 12 Hi-C datasets are filtered using three different parameter settings,  
260 and that we need to create contact matrices at four resolutions (1Mb, 100kb, 40kb and  
261 10kb). Then, the number of output objects (contact matrices in this case) will be 144 (i.e.  
262  $12 \times 3 \times 4$ ). Although many computational scenarios can be realized by this simple one-  
263 to-one mapping of input-output objects, more complex scenarios are frequently  
264 encountered, as described in the next section.

265

### 266 **Filtering, splitting and grouping input objects into new output objects**

267 Oftentimes, a simple one-to-one mapping of input objects to output objects is not  
268 desirable. For this reason, we introduce the concepts of filtering, splitting and grouping of  
269 input objects which are used to modify the behavior of *pipeline-master-explorer* (see

270 **Figure 2B).** *Filtering* is required when some input objects are not relevant for a given  
271 task, e.g. TAD calling is not performed on 1Mb-resolution contact matrices, and specific  
272 DNA-DNA interactions are not meaningful for resolutions greater than 10-20kb. *Splitting*  
273 is necessary in some cases: for example, we split the input objects by genome assembly  
274 (hg19, mm10) when comparing contact matrices or domains across samples, since only  
275 matrices or domains from the same genome assembly can be compared directly. In our  
276 platform, the user is allowed to split a collection of input objects by any variable contained  
277 in the sample sheet (except fastq files), thus allowing user-defined splits of the data, such  
278 as by cell type or treatment. Complementary to the splitting concept, *grouping* permits the  
279 aggregation of a collection of input objects (sharing the same value of a variable defined  
280 in the sample sheet) into a single output object. For example, the user may want to create  
281 genome browser tracks or contact matrices of combined technical and/or biological  
282 replicates, or group all input objects (samples) together in tasks such as Principal  
283 Components Analysis (PCA) or alignment/filtering statistics.

#### 284 285 **Combinatorial objects**

286 Even after introducing the concepts described above, more complex scenarios are  
287 possible as some tasks require the input of pairs (or triplets etc.) of objects. This feature  
288 has also been implemented in our pipeline (tuples in **Figure 2B**) and is currently used in  
289 the *compare-matrices* and *compare-boundaries* tasks. However, it should be utilized  
290 wisely (for example in conjunction with filtering, splitting and grouping) because it may  
291 lead to a combinatorial “explosion” of output objects.

#### 292 293 **Parameter scripts**

294 The design of our platform is motivated by the need to facilitate the use of different  
295 parameter settings for each pipeline task. For this reason, we have implemented wrapper  
296 scripts for each tool/method used in each task. For example, we have implemented a  
297 wrapper script for alignment, filtering, correcting contact matrices using IC or HiCNorm  
298 (separate wrappers), TAD calling using Armatus [30], TopDom [31], DI [5] and insulation  
299 index (Crane) [32] (separate wrappers). The main motivation is to hide most of the  
300 complexity inside the wrapper script and allow the user to modify the parameters using a  
301 simple but flexible parameter script. Unlike static parameter files, parameter scripts allow  
302 for dynamic calculation of parameters based on certain input variables (e.g. enzyme  
303 name, group name etc.). Within this framework, by adding and/or modifying simple  
304 parameter scripts, the user can explore the effect of different parameters (a) on the task  
305 directly affected by these parameters, and (b) on all dependent downstream tasks.  
306 Additionally, these parameter scripts serve as a record of parameters and tool versions  
307 that were used to produce the results, facilitating analysis reproducibility as well as  
308 documentation in scientific reports and manuscripts.

309

### 310 **Results stored as computational trails**

311 All the concepts described above have been implemented in a single R script named  
312 *pipeline-master-explorer*. This script maintains a database of input-output objects for each  
313 task, stored in a hidden directory under results (results/.db). It also creates a “run” script  
314 which is executed in order to generate all the desired results. All results are stored in the  
315 results directory in a tree structure that reveals the computational trail for each object (see  
316 examples shown in **Figure 2B** and **Supplementary Table 2**). Therefore, the user can

317 easily infer how each object was created, including what inputs and what parameters  
318 were used.

### 319 320 **Initiating a new reproducible analysis**

321 In the interest of data analysis reproducibility, any new analysis requires creating a copy  
322 of the code and pipeline structure into a desired location, effectively creating a branch.  
323 This way, any changes in the code repository will not affect the analysis and conversely,  
324 the user can customize the code according to the requirements of each project without  
325 modifying the code repository. Copying of the code and initiating a new analysis is done  
326 simply by invoking the script “*pipeline-new-analysis.tcsh*” as described in the User  
327 Manual.

### 328 329 **Pipeline tasks**

330 A pipeline consists of a number of (partially) ordered tasks that can be described by a  
331 directed acyclic graph which defines all dependencies. HiC-bench implements a total of  
332 20 tasks as shown in the workflow of **Figure 1**. In the analysis directory structure, each  
333 task is assigned its own subdirectory found inside the pipeline directory starting from the  
334 top level. This directory includes a symbolic link to the inputs of the analysis (fastq files,  
335 sample sheet, etc.), a link to the code, a directory (*inpdirs*) containing links to all  
336 dependencies, a directory containing parameter scripts (see below) and a “*run*” script  
337 which can be used to generate all the results of this task. The “*run*” scripts of each task  
338 are executed in the specified order by the master “*run*” script located at the top level (see  
339 User Manual for details on pipeline directory structure).

340

## 341 **Input data and the sample sheet**

342 Before performing any analysis, a computational pipeline needs input data. All input data  
343 for our pipeline tasks are stored in their own “*inputs*” directory accessible at the top level  
344 (along with the numbered pipeline tasks) and via symbolic links from within the directories  
345 assigned to each task to allow easy access to the corresponding input data. A “*readme*”  
346 file explains how to organize the input data inside the inputs directory (see User Manual  
347 for details). Briefly, the *fastq* subdirectory is used to store all fastq files, organized into  
348 one subdirectory per sample. Then, the sample sheet needs to be generated. This can  
349 be done automatically using the “*create-sample-sheet.tcsh*” script, but the user can also  
350 manually modify and expand the sample sheet with features beyond what is required.  
351 Currently required features are the sample name (to be used in all downstream analyses),  
352 fastq files (R1 and R2 in separate columns), genome assembly version (e.g. hg19, mm10)  
353 and restriction enzyme name (e.g. HindIII, NcoI). Adding more features, such as different  
354 group names (e.g. sample, cell type, treatment), allows the user to perform more  
355 sophisticated downstream analyses, such as grouping replicates for generating genome  
356 browser tracks, or splitting samples by genome assembly to compare boundaries (see  
357 previous section on grouping and splitting).

## 358 359 **Executing the pipeline**

360 The entire pipeline can be executed automatically by the “*pipeline-execute.tcsh*” script,  
361 as shown below:

362 **`code/code.main/pipeline-execute <project name> <user e-mail address>`**

363 where <project name> will be substituted by the name of the project and <user e-mail  
364 address> by the preferred e-mail address of the person who runs the analysis in order to



365 be notified upon completion. The “*pipeline-execute.tcsh*” script essentially executes the  
366 “run” script for each task (following the specified order). At the completion of every task,  
367 the log files of all finished jobs are inspected for error messages. If error messages are  
368 found, the pipeline aborts with an error message.

369

## 370 **Timestamping**

371 Besides creating the “*run*” script used to generate all results, the “*pipeline-master-*  
372 *explorer.r*” script, also checks whether existing output objects are up-to-date when  
373 compared to their dependencies (i.e. input objects and parameter scripts; can be  
374 expanded to include code dependencies as well). Currently, the pipelines are setup so  
375 that out-of-date objects are not deleted and recomputed automatically, but only presented  
376 to the user as a warning. The user can then choose to delete them manually and re-  
377 compute. The reason for this is to protect the user against accidentally repeating  
378 computationally demanding tasks (e.g. alignments) without given first the chance to  
379 review why certain objects may be out-of-date. From a more philosophical point of view,  
380 and in the interest of keeping a record of all computations (when possible), the user may  
381 never want to modify parameter files or the code for a given project, but instead only add  
382 new parameter files. Then, no object will be out-of-date, and only new objects will need  
383 to be recomputed every time.

384

## 385 **Alignment and filtering**

386 Paired-end reads were mapped to the reference genome (hg19 or mm10) using Bowtie2  
387 [26]. Reads with low mapping quality (MAPQ<30) were discarded. Local alignments of  
388 input read pairs were performed as they consist of chimeric reads between two (non-

389 consecutive) interacting fragments. This approach yielded a high percentage of mappable  
390 reads (> 95%) for all datasets (**Supplementary Figure 1**). Mapped read pairs were  
391 subsequently filtered for known artifacts of the Hi-C protocol such as self-ligation,  
392 mapping too far from the enzyme's known cutting sites etc. More specifically, reads  
393 mapping in multiple locations on the reference genome (*multihit*), double-sided reads that  
394 mapped to the same enzyme fragment (*ds-same-fragment*), reads whose 5'-end mapped  
395 too far (*ds-too-far*) from the enzyme cutting site, reads with only one mappable end  
396 (*single-sided*) and unmapped reads (*unmapped*), were discarded. Read pairs that  
397 corresponded to regions that were very close (less than 25 kilobases, *ds-too-close*) in  
398 linear distance on the genome as well as duplicate read pairs (*ds-duplicate-intra* and *ds-*  
399 *duplicate-inter*) were also discarded. In **Supplementary Figure 1**, we show detailed  
400 paired-end read statistics for the Hi-C datasets used in this study. We include the read  
401 numbers (**Supplementary Figure 1A**) and their corresponding percentages  
402 (**Supplementary Figure 1B**). Eventually, approximately 10-50% of paired-reads passed  
403 all filtering criteria and were used for downstream analysis (**Supplementary Figure 1B**).  
404 The statistics report is automatically generated for all input samples. The tools and  
405 parameter settings used for the alignment and filtering tasks are fully customizable and  
406 can be defined in the corresponding parameter files.

407

#### 408 **Contact matrix generation, normalization and correction**

409 The read-pairs that passed the filtering task were used to create Hi-C contact matrices  
410 for all samples. The elements of each contact matrix correspond to pairs of genomic  
411 "bins". The value in each matrix element is the number of read pairs aligning to the  
412 corresponding genomic regions. In this study, we used various resolutions, ranging from

413 fine (10kb) to coarse (1Mb). The resulting matrices either remained unprocessed  
414 (filtered), or they were processed using different correction methods including HiCNorm  
415 [28], iterative correction (IC or ICE) [9] as well as “naïve scaling”. In **Supplementary**  
416 **Figure 2**, we present the average Hi-C count as a function of the distance between the  
417 interacting fragments, separately for each Hi-C matrix for not corrected (filtered) and IC-  
418 corrected matrices.

### 419 420 **Comparison of contact matrices**

421 Our pipeline allows direct comparison and visualization of the generated Hi-C contact  
422 matrices. More specifically, using our *hic-matrix* tool, all pairwise Pearson and Spearman  
423 correlations were automatically calculated for each (a) input sample, (b) resolution, and  
424 (c) matrix correction method. The corresponding correlograms were automatically  
425 generated using the *corrgram* R package [39]. A representative example is shown in  
426 **Supplementary Figure 3**. The correlograms summarizing the pairwise Pearson  
427 correlations for all samples used in this study are presented before and after matrix  
428 correction using the iterative correction algorithm. These plots are very useful because  
429 the user can quickly assess the similarity between technical and biological replicates as  
430 well as differences between various cell types. As shown before (Supplementary Figure  
431 3 in [5]), iterative correction improves the correlation between enzymes at the expense of  
432 a decreased correlation between samples prepared using the same enzyme.

### 433 434 **Boundary scores**

435 Topological domains (TADs) are defined as genomic neighborhoods of highly interacting  
436 chromatin, with relatively more infrequent inter-domain interactions [5,40,41]. Topological

437 domains are demarcated by boundaries, i.e. genomic regions bound by insulators thus  
438 hampering DNA contacts across adjacent domains. For each genomic position, in a given  
439 resolution (typically 40kb or less), we define a “boundary score” to quantify the insulation  
440 strength of this position. The higher the boundary score, the higher the insulation strength  
441 and the probability that this region actually acts as a boundary between adjacent domains.  
442 The idea of boundary scores is further illustrated in **Supplementary Figure 4**, where two  
443 adjacent TADs are shown. The upstream TAD on the left (*L*) is separated from the  
444 downstream TAD on the right (*R*) by a boundary (black circle). We define two parameters,  
445 the distance from the diagonal of the Hi-C contact matrix to be excluded from the  
446 boundary score calculation ( $\delta$ ) (not shown) and the maximum distance from the diagonal  
447 to be considered ( $d$ ). The corresponding parameter values can be selected by the user.  
448 For this analysis, we used  $\delta=0$  and  $d=2\text{Mb}$  as suggested before [5]. In addition to the  
449 published directionality index [5], we defined and computed the “*inter*”, “*intra-max*” and  
450 “*ratio*” scores, defined as follows:

$$\begin{aligned} 451 \quad & \text{inter} = \text{mean}(X) \\ 452 \quad & \text{intra}_{\text{max}} = \max(\text{mean}(L), \text{mean}(R)) \\ 453 \quad & \text{ratio} = \text{intra}_{\text{max}}/\text{inter} \end{aligned}$$

454  
455 Principal component analysis (PCA) of boundary scores across samples in this study,  
456 before and after matrix correction, shows that biological replicates tend to cluster  
457 together, either in the case of filtered or corrected (IC) matrices (**Supplementary Figure**  
458 **5**).

## 459 **Topological domains**

461 Topologically-associated domains (TADs) are increasingly recognized as an important  
462 feature of genome organization [5]. Despite the importance of TADs in genome

463 organization, very few Hi-C pipelines have integrated TAD calling (e.g. TADbit [19]). In  
464 HiC-bench, we have integrated TAD calling as a pipeline task and we demonstrate this  
465 integration using different TAD callers: (a) Armatus [30], (b) TopDom [31], (c) DI [5], (d)  
466 insulation index (Crane) [32] and (c) our own hic-matrix (domains). Our pipeline makes it  
467 straightforward to plug in additional TAD callers, by installing these tools and setting up  
468 the corresponding wrapper scripts. HiC-bench also facilitates the direct comparison of  
469 TADs across samples by automatically calculating the number of TAD boundaries and all  
470 the pairwise overlaps of TAD boundaries across all inputs, generating the corresponding  
471 graphs (as in the case of matrix correlations described in a previous section). We define  
472 boundary overlap as the ratio of the intersection of boundaries between two replicates (A  
473 and B) over the union of boundaries in these two replicates, as shown in the equation  
474 below:

$$475 \quad \text{boundary\_overlap} = (A \cap B) / (A \cup B)$$

476 For the boundary overlap calculation, we extended each boundary by 40kb on both sides  
477 (+/- 40kb flanking region, i.e. the size of one bin). The fact that HiC-bench allows  
478 simultaneous exploration of all parameter settings for all installed TAD-calling algorithms,  
479 greatly facilitates parameter exploration, optimization as well as assessment of algorithm  
480 effectiveness. Pairwise comparison of boundaries (boundary overlaps) across samples is  
481 shown in **Supplementary Figure 6** and **Figure 3**.

482

### 483 **Visualization**

484 In our pipeline, we also take advantage of the great visualization capabilities offered by  
485 the recently released HiCPlotter [23], in order to allow the user to visualize Hi-C contact

486 matrices along with TADs (in triangle format) for multiple genomic regions of interest. The  
487 user can also add binding profiles in BedGraph format for factors (e.g. CTCF), boundary  
488 scores, histone marks of interest (e.g. H3K4me3, H3K27ac) etc. An example is shown in  
489 **Supplementary Figure 7**, where an area of the contact matrix of human embryonic stem  
490 cells (H1) (HindIII) is presented along with the corresponding TADs (triangles), various  
491 boundary scores, the CTCF binding profile and annotations of selected genomic  
492 elements, before and after matrix correction (IC). The integration of HiCPlotter in our  
493 pipeline, allows the user to easily create publication-quality figures for multiple areas of  
494 interest simultaneously.

#### 495 **Specific interactions, annotations and enrichments**

497 The plummeting costs of next-generation sequencing have resulted in a dramatic  
498 increase in the resolution achieved in Hi-C experiments. While the original Hi-C study  
499 reported interaction matrices of 1Mb resolution [2], recently 1kb resolution was reported  
500 [42]. Thus, the characterization and annotation of specific genomic interactions from Hi-  
501 C data is an important feature of a modern Hi-C analysis pipeline. HiC-bench generates  
502 a table of the interacting loci based on parameters defined by the user. These parameters  
503 include the resolution, the lowest number of read pairs required per interacting area as  
504 well as the minimum distance between the interacting partners. The resulting table  
505 contains the coordinates of the interacting loci, the raw count of interactions between  
506 them, the number of interactions after “scaling” and the number of interactions between  
507 the partners after distance normalization (observed Hi-C counts normalized by expected  
508 counts as a function of distance). This table is further annotated with the gene names or  
509 the factors (e.g. CTCF) and histone modification marks (e.g. H3K4me1, H3K27ac,

510 H3K4me3) that overlap with the interacting loci. The user can provide bed files with the  
511 features of interest to be used for annotation. As an example, the enrichment of chromatin  
512 marks in the top 50000 chromatin interactions in the H1 and IMR90 samples is presented  
513 in **Supplementary Figure 8**.

514

### 515 **Software requirements**

516 The software requirements are: Bowtie2 aligner [26], Python (2.7 or later) (along with  
517 Numpy, Scipy and Matplotlib libraries), R (3.0.2) [43], various R packages (lattice,  
518 RColorBrewer, corrplot, reshape, gplots, preprocessCore, zoo, reshape2, plotrix,  
519 pastecs, boot, optparse, ggplot2, igraph, Matrix, MASS, flsa, VennDiagram, futile.logger  
520 and plyr) and HiCPlotter [23]. More details on the versions of the packages can be found  
521 in the User Manual (sessionInfo()). In addition, installation of mirnylib Python library [44]  
522 is required for matrix balancing based on IC (ICE). The pipeline has been tested on a  
523 high-performance computing cluster based on Sun Grid Engine (SGE). The operating  
524 system used was Redhat Linux GNU (64 bit).

## 525 **Results**

526 We used HiC-bench to analyze several published Hi-C datasets and the results of our  
527 analysis are presented below. Additionally, we performed a comprehensive benchmark  
528 of existing and new TAD callers exploring different matrix correction methods, parameter  
529 settings and sequencing depths. Our results can be reproduced by re-running the  
530 corresponding pipeline snapshot available upon request as a single compressed archive  
531 file (too big to include as a Supplemental file).

532

### 533 **Comprehensive reanalysis of available Hi-C datasets using HiC-bench**

534 Our platform is designed to facilitate and streamline the analysis of a large number of  
535 available Hi-C datasets in batch. Thus, we collected and comprehensively analyzed  
536 multiple Hi-C samples from three large studies [5,42,45]. From the first study we analyzed  
537 IMR90 (HindIII) samples, from the second we analyzed Hi-C samples from  
538 lymphoblastoid cells (GM12878), human lung fibroblasts (IMR90 (Mbol)),  
539 erythroleukemia cells (K562), chronic myelogenous leukemia (CML) cells (KBM-7) and  
540 keratinocytes (NHEK), and from the third one, we analyzed samples from human  
541 embryonic stem cells (H1) and all the embryonic stem-cell derived lineages mentioned,  
542 including mesendoderm, mesenchymal stem cells, neural progenitor cells and  
543 trophoctoderm cells. All datasets yielded at least 40 million usable intra-chromosomal  
544 read pairs in at least two biological replicates. We performed extensive quality control on  
545 all datasets, calculating the read counts and percentages per classification category  
546 (**Supplementary Figure 1**), the attenuation of Hi-C signal over genomic distance  
547 (**Supplementary Figure 2**), the correlation of Hi-C matrices before and after matrix  
548 correction (**Supplementary Figure 3**), the similarity of boundary scores (**Supplementary**  
549 **Figure 5**) and all pairwise boundary overlaps across samples (**Supplementary Figure**  
550 **6**). In addition, we performed a comprehensive benchmarking of our own and published  
551 TAD callers, across all reanalyzed Hi-C datasets. The results of our benchmark are  
552 presented in the following sections.

553

### 554 **Iterative correction of Hi-C contact matrices improves reproducibility of TAD** 555 **boundaries**

556



557 Iterative correction has been shown to correct for known biases in Hi-C [9]. Thus, we  
558 hypothesized that IC may increase the reproducibility of TAD calling. We performed a  
559 comprehensive analysis calculating the TAD boundary overlaps for biological replicates  
560 of the same sample (as described in Methods section), using different TAD callers and  
561 different main parameter values for each TAD caller (**Figure 3A**). After comparing TAD  
562 boundary overlaps between filtered (uncorrected) and IC-corrected matrices, we  
563 observed an improvement in the boundary overlap when corrected matrices were used,  
564 irrespective of TAD caller and parameter settings (**Figure 3B**). The only exception was  
565 DI. Careful examination of the overlaps per sample revealed that IC introduced outliers  
566 only in the case of DI (in general, the opposite was true for the other callers). We  
567 hypothesize that IC may occasionally negatively affect the computation of the  
568 directionality index, especially because its calculation depends on a smaller number of  
569 bins (1-dimensional line) compared to the rest of the methods (2-dimensional triangles).  
570 In addition to the increase in the mean value of boundary overlap upon correction, we  
571 observed that the standard deviation of boundary overlaps among replicates decreased  
572 (again, with the exception of DI) (**Figure 3C**). While this seems to be the trend for almost  
573 all TAD caller/parameter value combinations, the effect of correction in variance is more  
574 profound in certain cases (e.g. hicintra-max) than others. It is also worth mentioning that  
575 increased size of the insulation window (in the case of Crane), the resolution parameter  
576  $\gamma$  (Armatus) or the distance  $d$  (hicinter, hicintra-max, hicratio) may result in certain cases  
577 in increased boundary overlap (e.g. Armatus), but this is not generalizable (e.g. hicintra-  
578 max). Interestingly, increased TAD boundary overlap does not necessarily mean  
579 increased consistency in the number of predicted TADs across sample types, as would

580 be expected since TADs are largely invariant across cell types [5]. For example, the TAD  
581 calling algorithm which is based on insulation score (Crane), predicted similar TAD  
582 overlaps and similar TAD numbers for different insulation windows (ranging from 0.5Mb  
583 to 2Mb), whereas Armatus performed particularly well in terms of TAD boundary  
584 reproducibility for a wide range of settings (**Figure 3A**) but the corresponding predicted  
585 TAD numbers varied considerably (**Figure 3D**). This may be partly due to the nature of  
586 the Armatus algorithm, as it has been built to reveal multiple levels of chromatin  
587 organization (TADs, sub-TADs etc.). We conclude that while iterative correction improves  
588 the reproducibility of TAD boundary detection across replicates, the number of predicted  
589 TADs should be also taken into account when selecting TAD calling method for  
590 downstream analysis. The method of choice should be the one that is robust in terms of  
591 both reproducibility and number of predicted TADs.

### 592 **Increased sequencing depth improves the reproducibility of TAD boundaries**

593  
594  
595 After selecting the parameter setting that optimized TAD boundary overlap between  
596 biological replicates of the same sample per TAD caller, we also investigated the effect  
597 of sequencing depth on the reproducibility of TAD boundary detection. Since some of the  
598 input samples were limited to only 40 million usable intra-chromosomal Hi-C read pairs,  
599 we resampled 10 million, 20 million and 40 million read pairs from each sample and  
600 evaluated the effect of increasing sequencing depth on TAD boundary reproducibility. The  
601 results are depicted in **Figure 4A**. We noticed that increased sequencing depth resulted  
602 in increased TAD boundary overlap, regardless of the TAD calling algorithm used (**Figure**  
603 **4A,C**). As far as the TAD numbers are concerned, increased sequencing depth  
604 decreased TAD number variability for certain callers (e.g. hicratio) but not in all cases

605 (e.g. DI) (**Figure 4B**). In many cases, increased sequencing depth, decreased the  
606 variance of TAD boundary overlap among replicates (**Figure 4C**). In summary, based on  
607 this benchmark, we recommend that Hi-C samples should be sufficiently sequenced as  
608 sequencing depth seems to affect TAD calling reproducibility.

## 609 610 **Conclusions**

611 Recently, several computational tools and pipelines have been developed for Hi-C  
612 analysis. Some focus on matrix correction, others on detection of specific chromatin  
613 interactions and their differences across conditions and others on visualization of these  
614 interactions. However, very few of these tools offer a complete Hi-C analysis (e.g. HiFive,  
615 HiCUP or HiC-Pro), addressed all tasks ranging from alignment to interaction annotation,  
616 enrichment analysis and visualization. HiC-bench is a comprehensive Hi-C analysis  
617 pipeline with the ability to process many samples in parallel, record and visualize the  
618 results in each task, thus facilitating troubleshooting and further analyses. It integrates  
619 both existing tools but also new tools that we developed to perform certain Hi-C analysis  
620 tasks. In addition, HiC-bench focuses on parameter exploration, reproducibility and  
621 extensibility. All parameter settings used in each pipeline task are automatically recorded,  
622 while future tools can be easily added using the supplied wrapper template. More  
623 importantly, HiC-bench is the only Hi-C pipeline so far that allows extensive parameter  
624 exploration, thus facilitating direct comparison of the results obtained by different tools,  
625 methods and parameters. This unique feature helps users test the robustness of the  
626 analysis, optimize the parameter settings and eventually obtain reliable and biologically  
627 meaningful results. To demonstrate the usefulness of HiC-bench, we performed a  
628 comprehensive benchmark of popular and newly-introduced TAD callers, varying the

629 matrix preprocessing (filtered or corrected matrices with ICE method), the sequencing  
630 depth, and the value of the main parameter of each TAD caller, which is usually the  
631 window used for the calculation of directionality index or insulation score. We found that  
632 the matrix correction has a positive effect on the boundary overlap between replicates  
633 and that increased sequencing depth leads to higher boundary overlap.

634 In conclusion, HiC-bench is an easy-to-use framework for systematic, comprehensive,  
635 integrative and reproducible analysis of Hi-C datasets. We expect that use of our platform  
636 will facilitate current analyses and enable scientists to further develop and test interesting  
637 hypotheses in the field of chromatin organization and epigenetics.

638

## 639 **List of abbreviations**

640 **DI:** directionality index

641 **IC or ICE:** iterative correction

642 **PCA:** Principal Component Analysis

643 **TAD:** Topological Domain or Topologically Associating Domain

644

## 645 **Ethics approval and consent to participate**

646 Not applicable.

647

## 648 **Consent for publication**

649 Not applicable.

## 650 **Availability of data and material**

651 Published Hi-C data were downloaded from Gene Expression Omnibus, using the  
652 corresponding accession numbers: GSE35156 [5], GSE63525 [42] and GSE52457 [45].

653 HiC-bench source code is freely available on GitHub and Zenodo.

654 Project name: HiC-bench

655 Project home page: <https://github.com/NYU-BFX/hic-bench/wiki>

656 Archived version: <https://zenodo.org/badge/latestdoi/20915/NYU-BFX/hic-bench>

657 Operating system: Redhat Linux GNU (64 bit)

658 Programming language: R, C++, Python, Unix shell scripts

659 Other requirements: none

660 License: MIT

661 Any restrictions to use by non-academics: None

662

## 663 **Competing interests**

664 The authors have no competing interests to declare.

665

## 666 **Funding**

667 The study was supported by a Research Scholar Grant, RSG-15-189-01 - RMC from the  
668 American Cancer Society and a Leukemia & Lymphoma Society New Idea Award, 8007-  
669 17 to Aristotelis Tsirigos (AT). NYU Genome Technology Center (GTC) is a shared  
670 resource, partially supported by the Cancer Center Support Grant, P30CA016087, at the  
671 Laura and Isaac Perlmutter Cancer Center

672

## 673 **Author contributions**

674 CL performed computational analyses, generated figures and implemented certain  
675 wrapper scripts. SK wrote the user manual. PN and IA offered biological insights and  
676 helped with the interpretation of Hi-C data. AT designed and implemented the pipeline.  
677 CL and AT wrote the manuscript.

678

## 679 **Acknowledgements**

680 Aristotelis Tsigiros was supported by a Research Scholar Grant, RSG-15-189-01 - RMC  
681 from the American Cancer Society and a Leukemia & Lymphoma Society New Idea  
682 Award, 8007-17. We would like to thank Dennis Shasha and Juliana Freire for inspiring  
683 discussions on data flows. We would also like to thank Kadir Caner Akdemir for useful  
684 discussions on the usage of HiCPlotter. We thank the NYU Genome Technology Center  
685 (GTC) for expert library preparation and sequencing. This shared resource is partially  
686 supported by the Cancer Center Support Grant, P30CA016087, at the Laura and Isaac  
687 Perlmutter Cancer Center. We also like to thank the NYU Applied Bioinformatics Center  
688 (BFX) for providing bioinformatics support and helping with the analysis and interpretation  
689 of the data. This work has used computing resources at the High Performance Computing  
690 Facility (HPCF) of the Center for Health Informatics and Bioinformatics at the NYU  
691 Langone Medical Center.

692

## 693 **Figure legends**

694 **Figure 1. HiC-bench workflow.** Raw reads (input fastq files) are aligned and then filtered  
695 (*align* and *filter* tasks). Filtered reads are used for the creation of Hi-C track files (*tracks*)  
696 that can be directly uploaded to the WashU Epigenome Browser [27]. A report with a  
697 statistics summary of filtered Hi-C reads, is also automatically generated (*filter-stats*).

698 Raw Hi-C matrices (*matrix-filtered*) are normalized using (a) scaling, (b) iterative  
699 correction [9] or (c) HiCNorm [28]. A report with the plots of the normalized Hi-C counts  
700 as function of the distance between the interacting partners (*matrix-stats*) is automatically  
701 generated for all methods. The resulting matrices are compared across all samples in  
702 terms of Pearson and Spearman correlation (*compare-matrices* and *compare-matrices-*  
703 *stats*). Boundary scores are calculated and the corresponding report with the Principal  
704 Component Analysis (PCA) is automatically generated (*boundary-scores* and *boundary-*  
705 *scores-pca*). Domains are identified using various TAD calling algorithms (*domains*)  
706 followed by comparison of TAD boundaries (*compare-boundaries* and *compare-*  
707 *boundaries-stats*). A report with the statistics of boundary comparison is also  
708 automatically generated. Hi-C visualization of user-defined genomic regions is performed  
709 using HiCPlotter (*hicplotter*) [23]. Specific chromatin interactions (*interactions*) are  
710 detected and annotated (*annotations*). Finally, enrichment of top interactions in certain  
711 chromatin marks, transcription factors etc. provided by the user, is automatically  
712 calculated (*annotations-stats*).

713 **Figure 2. (A) Computational trails.** Each combination of tools and parameter settings  
714 can be imagined as a unique computational “trail” that is executed simultaneously with all  
715 the other possible trails to create a collection of output objects. As an example, one of  
716 these possible trails is presented in red. The raw reads were aligned, filtered and then  
717 binned in 40kb resolution matrices. Our own naïve matrix scaling method was then used  
718 for matrix correction and domains were called using TopDom [31]. **(B) HiC-bench**  
719 **pipeline task architecture.** All pipeline tasks are performed by a single R script,  
720 “*pipeline-master-explorer.r*”. This script generates output objects based on all

721 combinations of input objects and parameter scripts while taking into account the split  
722 variable, group variable and tuple settings. The output objects are stored in the  
723 corresponding “*results*” directory. As an example, domain calling for IMR90 is presented.  
724 The filtered reads of the IMR90 Hi-C sample (digested with HindIII) are used as input.  
725 The pipeline-master-explorer script tests if TAD calling with these settings has been  
726 performed and if not it calls the domain calling wrapper script (*code/hicseq-domains.tcsh*)  
727 with the corresponding parameters (e.g. *params/params.armatus.gamma\_0.5.tcsh*).  
728 After the task is complete, the output is stored in the corresponding “*results*” directory.

729 **Figure 3. Comparison of topological domain calling methods subject to Hi-C**  
730 **contact matrix preprocessing by simple filtering or iterative correction (IC).** The  
731 methods were assessed in terms of boundary overlap between replicates (**A**), change  
732 (%) in mean boundary overlap after matrix correction (**B**), change (%) in standard  
733 deviation of mean overlap across replicates after matrix correction (**C**) and number of  
734 identified topological domains per cell type (**D**). The different colors correspond to the  
735 different callers. Gradients of the same color are used for the different values of the same  
736 parameter, ranging from low (light color) to high (dark color) values. The TAD callers  
737 along with the corresponding parameter settings are presented in the legend. For this  
738 analysis all available read pairs were used.

739 **Figure 4. Comparison of topological domain calling methods for different**  
740 **preprocessing method and sequencing depth.** TAD calling methods were assessed  
741 in terms of boundary overlap between replicates (**A**), number of identified topological  
742 domains (**B**) and boundary overlap across replicates upon increasing sequencing depth  
743 (**C**) for different matrix preprocessing (filtered and IC corrected) and different sequencing



744 depths (10 million, 20 million and 40 million reads). For TAD calling, only the optimal  
745 caller/parameter value pairs are shown (defined as the ones achieving the maximum  
746 boundary overlap for IC and 40 million reads). The boxplot and line colors correspond to  
747 the different TAD callers.

748

749 **Supplementary Figure 1. Hi-C reads filtering statistics.** Number **(A)** and percentage  
750 **(B)** of the various read categories identified during filtering for all datasets used in the  
751 study. Mappable reads were over 95% in all samples. Duplicate (*ds-duplicate-intra* and  
752 *ds-duplicate-inter*; red and pink), non-uniquely mappable (*multihit*; light blue) and single-  
753 end mappable (*single-sided*; dark blue) reads were discarded. Self-ligation products (*ds-*  
754 *same-fragment*) and reads mapping too far (*ds-too-far*; light purple) from restriction sites  
755 or too close to one another (*ds-too-close*; orange) were also discarded. Only double-sided  
756 uniquely mappable *cis* (*ds-accepted-intra*; dark green) and *trans* (*ds-accepted-inter*; light  
757 green) read pairs were used for downstream analysis. The x axis represents either the  
758 raw read number (A) or the percentage of reads (B) falling within each of the categories  
759 described in the legend. The y axis represents the samples.

760 **Supplementary Figure 2. Matrix statistics.** Normalized Hi-C counts are presented as a  
761 function of the distance between the interacting partners for all samples and correction  
762 methods. The Hi-C samples analyzed were GM12878 (light blue), hESCs (H1) (blue),  
763 mesenchymal cells (light green), mesendoderm (dark green), neural progenitors (pink),  
764 trophoctoderm (red), IMR90 (light and dark orange), K562 (light purple), KBM7 (dark  
765 purple) and NHEK (yellow). The matrices were either unprocessed (filtered) (top) or

766 corrected using IC (bottom). The  $y$  axis represents the normalized count of Hi-C  
767 interactions and the  $x$  axis the distance between the interacting partners in kilobases.

768 **Supplementary Figure 3. Pairwise Pearson correlation of Hi-C matrices.**

769 Correlograms summarizing all pairwise Pearson correlations for all Hi-C samples used in  
770 this study: raw (filtered) matrices (left panel) and matrices after iterative correction (right  
771 panel). Dark red indicates strong positive correlation and dark blue strong negative. The  
772 resolution of the matrices is 40kb.

773 **Supplementary Figure 4. Boundary score calculation.** Two adjacent topological

774 domains (red triangles) are depicted. The left domain ( $L$ ) is separated from the right  
775 domain ( $R$ ) by a boundary (black circle). The areas of more-frequent intra-domain  
776 interactions are in red. The area of less-frequent cross-domain (or inter-domain)  
777 interactions is  $X$ . We also introduce parameter  $d$  which is the maximum distance from the  
778 diagonal to be considered for the calculation of boundary scores (default value:  $d=2\text{Mb}$ ).

779 **Supplementary Figure 5. Principal component analysis of boundary scores.**

780 Boundary scores were calculated using *ratio* score, for all samples either before (filtered)  
781 (left panel) or after iterative correction (IC) (right panel).

782 **Supplementary Figure 6. Pairwise overlaps of TAD boundaries.** The pairwise

783 overlaps of TAD boundaries are shown for all samples of this study, after calling  
784 boundaries using hicratio (all reads,  $d=0500$ ). Before TAD calling, the Hi-C matrices were  
785 either unprocessed (filtered) or corrected using iterative correction (IC) (resolution =  
786 40kb).

787 **Supplementary Figure 7. Visualization of TADs and certain areas of interest.** HiC-

788 bench integrates HiCPlotter [23] and it offers the ability to easily prepare publication-

789 quality figures. We present the area surrounding *NANOG*, a gene of particular importance  
790 for the maintenance of pluripotency. The Hi-C matrix corresponding to the  
791 chr12:3940389-11948655 genomic region is presented for H1 cells, before and after  
792 matrix correction. The matrix is also rotated 45° to facilitate TAD visualization. Various  
793 boundary scores (intra-max, DI, ratio) are shown as individual tracks along with CTCF  
794 binding. The location of *NANOG* is presented as a blue line.

795 **Supplementary Figure 8. Enrichment of chromatin interactions in human**  
796 **fibroblasts (IMR90) and embryonic stem cells (H1).** The enrichment of certain  
797 chromatin marks and CTCF in the top 50000 chromatin interactions in the IMR90 and H1  
798 samples is shown. Deep blue and larger circle size indicate higher enrichment.

799  
800

## 801 **Table legends**

802 **Table 1. Comparison of HiC-bench with published Hi-C analysis or visualization**  
803 **tools.** HiC-bench is a comprehensive and feature-rich Hi-C analysis pipeline that  
804 performs various Hi-C tasks by combining our newly-developed tools with existing tools.

805 **Table 2. The HiC-bench toolkit.** The HiC-bench toolkit consists mostly of newly-  
806 developed tools (shown in bold) but we have also incorporated existing tools to allow  
807 comparisons and benchmarking.

808 **Supplementary Table 1. HiC-bench task implementation.** The table summarizes how  
809 the pipeline tasks are implemented, which are the requirements for their execution and  
810 how they are handled by the *pipeline-master-explorer* script. The first column lists all the  
811 tasks performed by pipeline ranging from alignment to annotation. The second column

812 lists the input directory required for each task while the third one lists the parameter files.  
813 Certain tasks depend on the reference genome (human or mouse), thus the genome  
814 assembly acts as split variable (column 4). In some tasks, replicates can be grouped  
815 using the group variable (column 5). Pairwise comparisons between replicates or samples  
816 are also allowed using tuples (column 6). The last column lists the full pipeline-master-  
817 explorer command for each pipeline task.

818 **Supplementary Table 2. HiC-bench input-output objects.** The table summarizes the  
819 inputs and outputs of the TAD-calling task using three different methods with parameter  
820 values stored in the params files (column 2). The first column describes the tree structure  
821 of the input directories that are essentially the different Hi-C matrices for each sample,  
822 before (filtered) and after matrix correction using different methods (e.g. IC). The second  
823 column lists all the different parameter scripts and the third column corresponds to the  
824 tree structure of the generated output objects.

825

## 826 **References**

827

- 828 1. Dekker J, Marti-Renom MA, Mirny LA. Exploring the three-dimensional organization of  
829 genomes: interpreting chromatin interaction data. *Nat Rev Genet.* 2013;14:390–403.
- 830 2. Lieberman-Aiden E, van Berkum NL, Williams L, Imakaev M, Ragoczy T, Telling A, et al.  
831 Comprehensive mapping of long-range interactions reveals folding principles of the human  
832 genome. *Science.* 2009;326:289–93.
- 833 3. Belton J-M, McCord RP, Gibcus JH, Naumova N, Zhan Y, Dekker J. Hi-C: a comprehensive  
834 technique to capture the conformation of genomes. *Methods.* 2012;58:268–76.
- 835 4. Fraser J, Ferrai C, Chiariello AM, Schueler M, Rito T, Laudanno G, et al. Hierarchical folding  
836 and reorganization of chromosomes are linked to transcriptional changes in cellular  
837 differentiation. *Molecular Systems Biology.* 2015;11:852–2.
- 838 5. Dixon JR, Selvaraj S, Yue F, Kim A, Li Y, Shen Y, et al. Topological domains in mammalian

- 839 genomes identified by analysis of chromatin interactions. *Nature*. 2012;485:376–80.
- 840 6. Phillips-Cremins JE, Sauria MEG, Sanyal A, Gerasimova TI, Lajoie BR, Bell JSK, et al.  
841 Architectural protein subclasses shape 3D organization of genomes during lineage  
842 commitment. *Cell*. 2013;153:1281–95.
- 843 7. Vietri Rudan M, Barrington C, Henderson S, Ernst C, Odom DT, Tanay A, et al. Comparative Hi-  
844 C Reveals that CTCF Underlies Evolution of Chromosomal Domain Architecture. *Cell Rep*.  
845 2015;10:1297–309.
- 846 8. Yaffe E, Tanay A. Probabilistic modeling of Hi-C contact maps eliminates systematic biases to  
847 characterize global chromosomal architecture. *Nat Genet*. 2011;43:1059–65.
- 848 9. Imakaev M, Fudenberg G, McCord RP, Naumova N, Goloborodko A, Lajoie BR, et al. Iterative  
849 correction of Hi-C data reveals hallmarks of chromosome organization. *Nat Meth*. 2012;9:999–  
850 1003.
- 851 10. Cournac A, Marie-Nelly H, Marbouty M, Koszul R, Mozziconacci J. Normalization of a  
852 chromosomal contact map. *BMC Genomics*. 2012;13:436.
- 853 11. Koszul R. HiC-Box. <https://github.com/rkoszul/HiC-Box>. Accessed 20 February 2016.
- 854 12. Servant N, Varoquaux N, Lajoie BR, Viara E, Chen C-J, Vert J-P, et al. HiC-Pro: an optimized  
855 and flexible pipeline for Hi-C data processing. *Genome Biol*. 2015;16:259.
- 856 13. Li W, Gong K, Li Q, Alber F, Zhou XJ. Hi-Corrector: a fast, scalable and memory-efficient  
857 package for normalizing large-scale Hi-C data. *Bioinformatics*. 2015;31:960–2.
- 858 14. Castellano G, Le Dily F, Hermoso Pulido A, Beato M, Roma G. Hi-Cpipe: a pipeline for high-  
859 throughput chromosome capture. *bioRxiv*. 2015; doi: 10.1101/020636
- 860 15. Sauria ME, Phillips-Cremins JE, Corces VG, Taylor J. HiFive: a tool suite for easy and efficient  
861 HiC and 5C data analysis. *Genome Biol*. 2015;16:237.
- 862 16. Heinz S, Benner C, Spann N, Bertolino E, Lin YC, Laslo P, et al. Simple Combinations of  
863 Lineage-Determining Transcription Factors Prime cis-Regulatory Elements Required for  
864 Macrophage and B Cell Identities. *Molecular Cell*. 2010;38:576–89.
- 865 17. Wingett S, Ewels P, Furlan-Magaril M, Nagano T, Schoenfelder S, Fraser P, et al. HiCUP:  
866 pipeline for mapping and processing Hi-C data. *F1000Res*. 2015;4:1310.
- 867 18. Krueger F, Andrews SR. SNPsplit: Allele-specific splitting of alignments between genomes  
868 with known SNP genotypes. *F1000Res*. 2016;5:1479.
- 869 19. Serra F, Baù D, Filion G, Marti-Renom MA. Structural features of the fly chromatin colors  
870 revealed by automatic three-dimensional modeling. *bioRxiv*. 2016; doi: 10.1101/036764.

871

872 20. Schmid MW, Grob S, Grossniklaus U. HiCdat: a fast and easy-to-use Hi-C data analysis tool.  
873 BMC Bioinformatics. 2015;16:390–6.

874 21. Hwang Y-C, Lin C-F, Valladares O, Malamon J, Kuksa PP, Zheng Q, et al. HIPPIE: a high-  
875 throughput identification pipeline for promoter interacting enhancer elements. Bioinformatics.  
876 2015;31:1290–2.

877 22. Phanstiel DH, Boyle AP, Araya CL, Snyder MP. Sushi.R: flexible, quantitative and integrative  
878 genomic visualizations for publication-quality multi-panel figures. Bioinformatics.  
879 2014;30:2808–10.

880 23. Akdemir KC, Chin L. HiCPlotter integrates genomic data with interaction matrices. Genome  
881 Biol. 2015;16:198.

882 24. Editorial. Rebooting review. Nat Biotechnol. 2015;33:319–9.

883 25. Goecks J, Nekrutenko A, Taylor J, Galaxy Team. Galaxy: a comprehensive approach for  
884 supporting accessible, reproducible, and transparent computational research in the life  
885 sciences. Genome Biol. 2010;11(8):R86.

886 26. Ben Langmead, Salzberg SL. Fast gapped-read alignment with Bowtie 2. Nat Meth.  
887 2012;9:357–9.

888 27. Zhou X, Lowdon RF, Li D, Lawson HA, Madden PAF, Costello JF, et al. Exploring long-range  
889 genome interactions using the WashU Epigenome Browser. Nat Meth. 2013;10:375–6.

890 28. Hu M, Hu M, Deng K, Deng K, Selvaraj S, Selvaraj S, et al. HiCNorm: removing biases in Hi-C  
891 data via Poisson regression. Bioinformatics. 2012;28:3131–3.

892 29. Tsigos A, Haiminen N, Bilal E, Utró F. GenomicTools: a computational platform for  
893 developing high-throughput analytics in genomics. Bioinformatics. 2012;28:282–3.

894 30. Filippova D, Patro R, Duggal G, Kingsford C. Identification of alternative topological domains  
895 in chromatin. Algorithms for Molecular Biology. 2014;9:14.

896 31. Shin H, Shi Y, Dai C, Tjong H, Gong K, Alber F, et al. TopDom: an efficient and deterministic  
897 method for identifying topological domains in genomes. Nucleic Acids Res. 2016;44(7):e70.

898 32. Crane E, Bian Q, McCord RP, Lajoie BR, Wheeler BS, Ralston EJ, et al. Condensin-driven  
899 remodelling of X chromosome topology during dosage compensation. Nature. 2015;523:240–4.

900 33. Van Bortle K, Nichols MH, Li L, Ong C-T, Takenaka N, Qin ZS, et al. Insulator function and  
901 topological domain border strength scale with architectural protein occupancy. Genome Biol.  
902 2014;15:R82.

- 903 34. Alekseyenko AA, Walsh EM, Wang X, Grayson AR, Hsi PT, Kharchenko PV, et al. The  
904 oncogenic BRD4-NUT chromatin regulator drives aberrant transcription within large topological  
905 domains. *Genes Dev.* 2015;29:1507–23.
- 906 35. Ludäscher B, Altintas I, Berkley C, Higgins D, Jaeger E, Jones M, et al. Scientific workflow  
907 management and the Kepler system. *Concurrency and Computation: Practice and Experience.*  
908 2006;18:1039–65.
- 909 36. Oinn T, Addis M, Ferris J, Marvin D, Senger M, Greenwood M, et al. Taverna: a tool for the  
910 composition and enactment of bioinformatics workflows. *Bioinformatics.* 2004;20:3045–54.
- 911 37. Freire J. Making Computations and Publications Reproducible with VisTrails. *Computing in*  
912 *Science & Engineering* 2012;14:18–25.
- 913 38. Bavoil L, Callahan SP, Crossno PJ, Freire J, Scheidegger CE, Silva CT, et al. VisTrails: enabling  
914 interactive multiple-view visualizations. *VIS 05 IEEE*; 2005. pp. 135–42.
- 915 39. Wright K. Plot a Correlogram. R package. <http://CRAN.R-project.org/package=corrgram>
- 916 40. Sexton T, Yaffe E, Kenigsberg E, Bantignies F, Leblanc B, Hoichman M, et al. Three-  
917 Dimensional Folding and Functional Organization Principles of the Drosophila Genome. *Cell*  
918 2012;148:458–72.
- 919 41. Nora EP, Lajoie BR, Schulz EG, Giorgetti L, Okamoto I, Servant N, et al. Spatial partitioning of  
920 the regulatory landscape of the X-inactivation centre. *Nature.* 2012;485:381–5.
- 921 42. Rao SSP, Huntley MH, Durand NC, Stamenova EK, Bochkov ID, Robinson JT, et al. A 3D Map  
922 of the Human Genome at Kilobase Resolution Reveals Principles of Chromatin Looping. *Cell.*  
923 2014;159:1665–80.
- 924 43. R Core Team. R: A language and environment for statistical computing. R Foundation for  
925 statistical Computing Vienna, Austria 2016. <https://www.R-project.org/>
- 926 44. mirnylib. <https://bitbucket.org/mirnylab/mirnylib>. Accessed on 20 May 2016.
- 927 45. Dixon JR, Jung I, Selvaraj S, Shen Y, Antosiewicz-Bourget JE, Lee AY, et al. Chromatin  
928 architecture reorganization during stem cell differentiation. *Nature.* 2015;518:331–6.
- 929

Figure 1

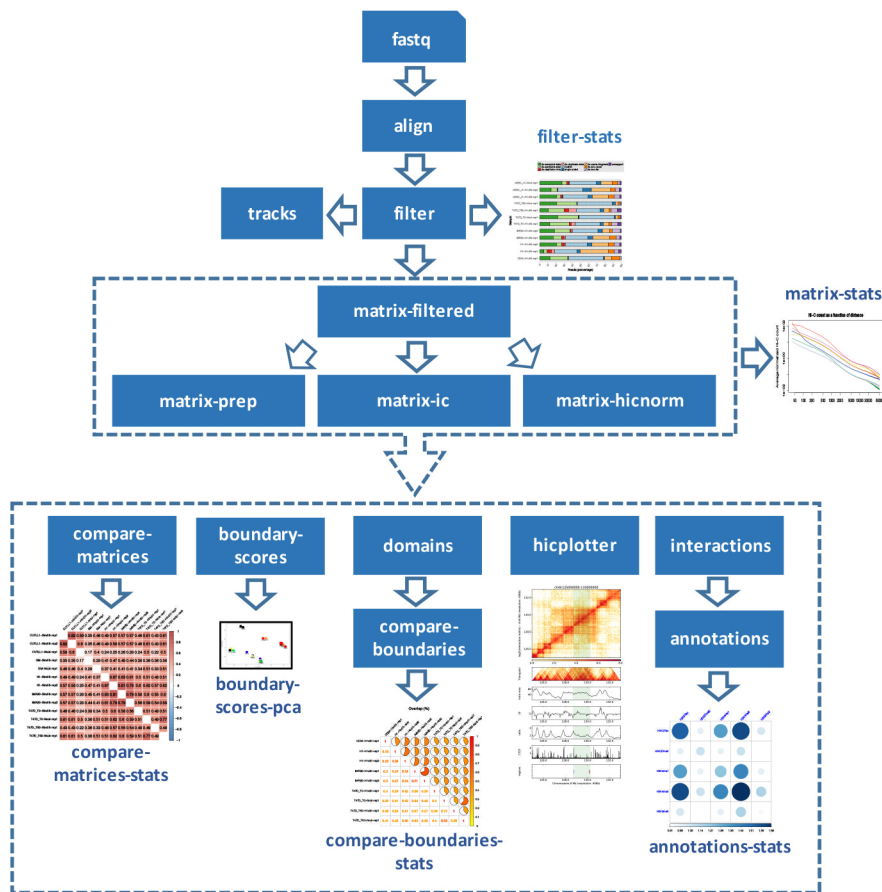



Figure 2

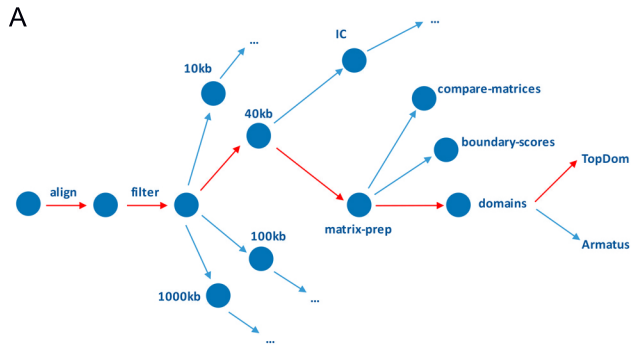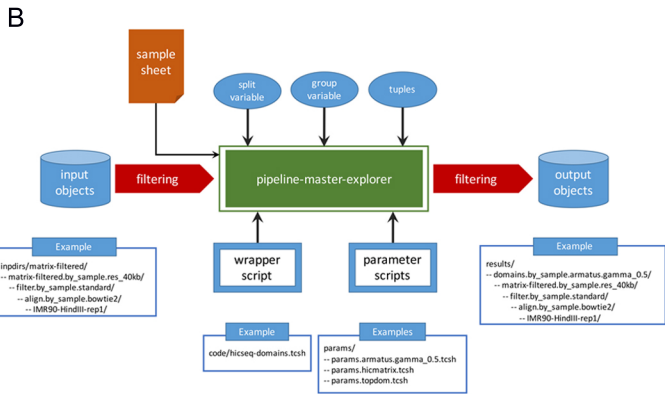

A

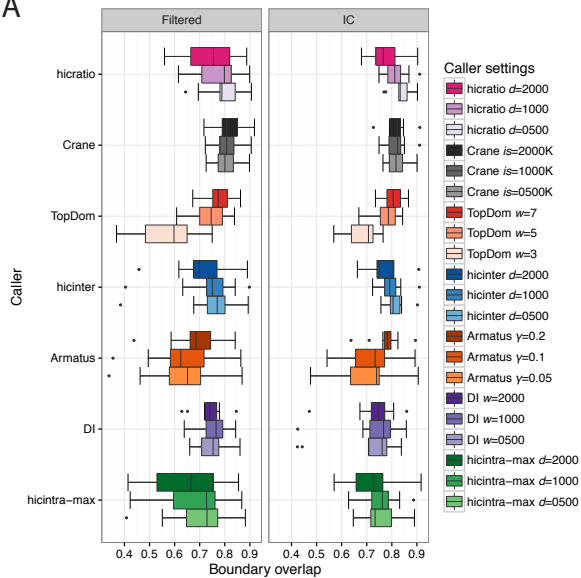

B

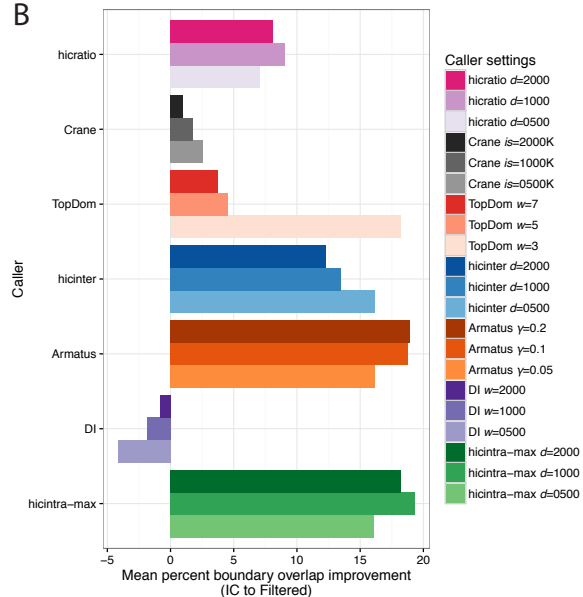

C

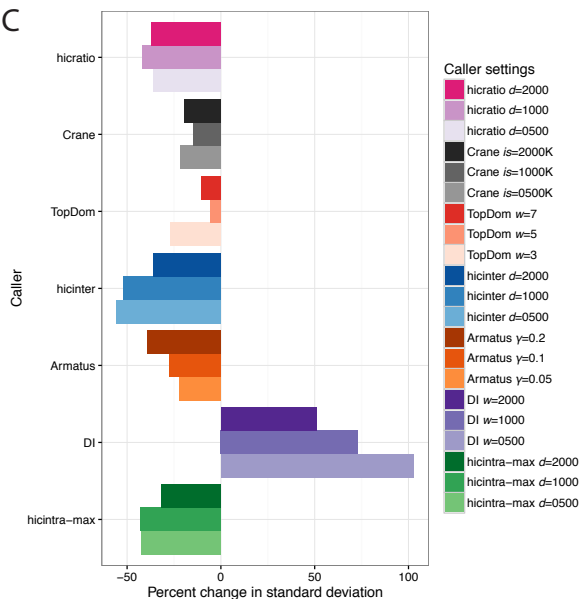

D

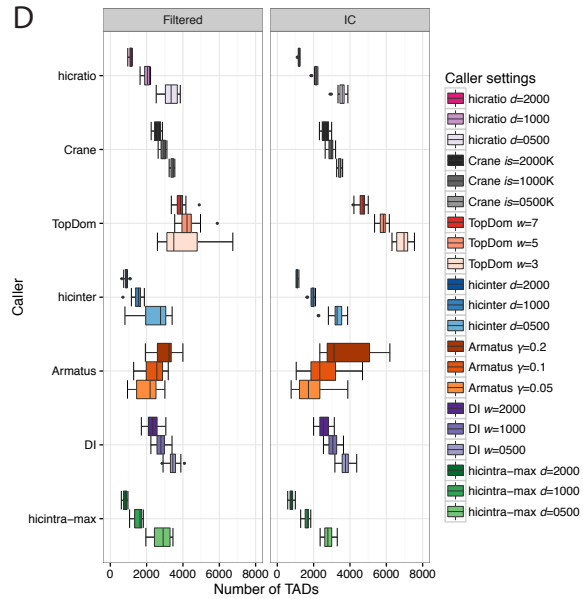

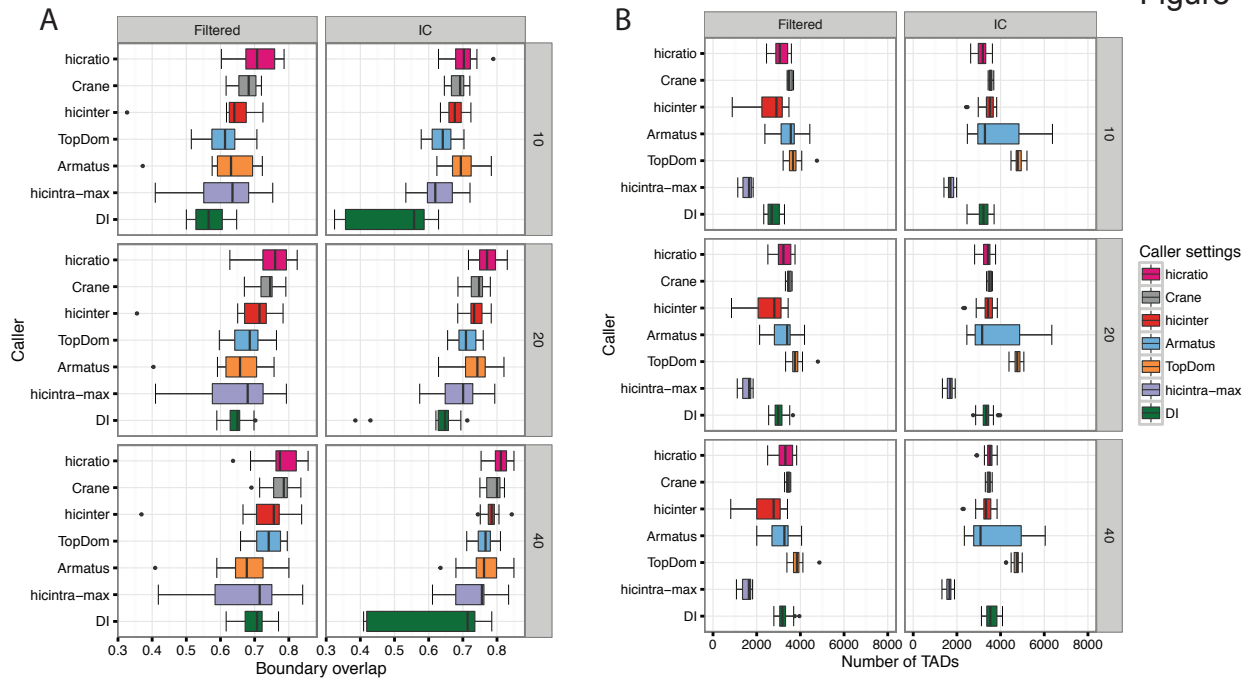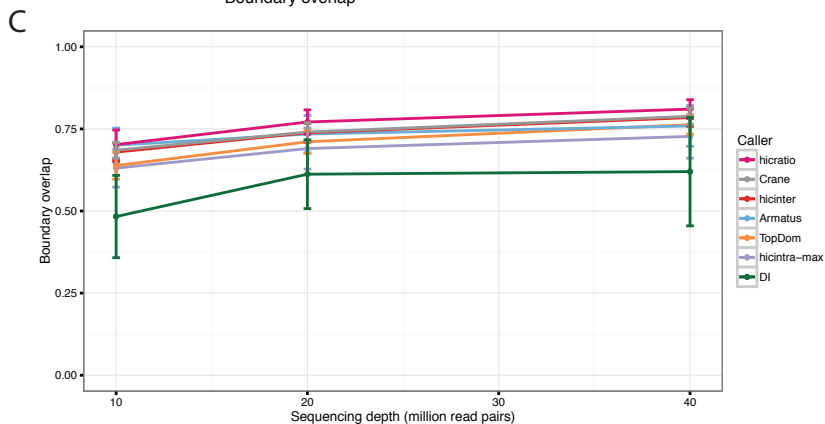

# Supplementary Figure 1

A

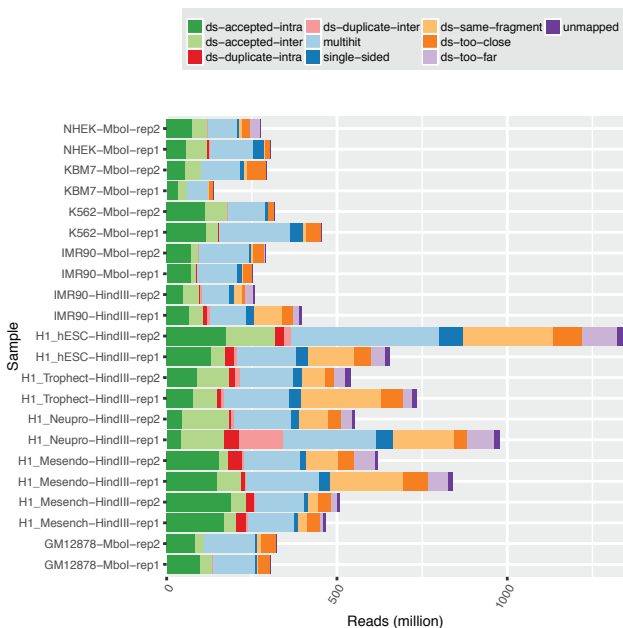

B

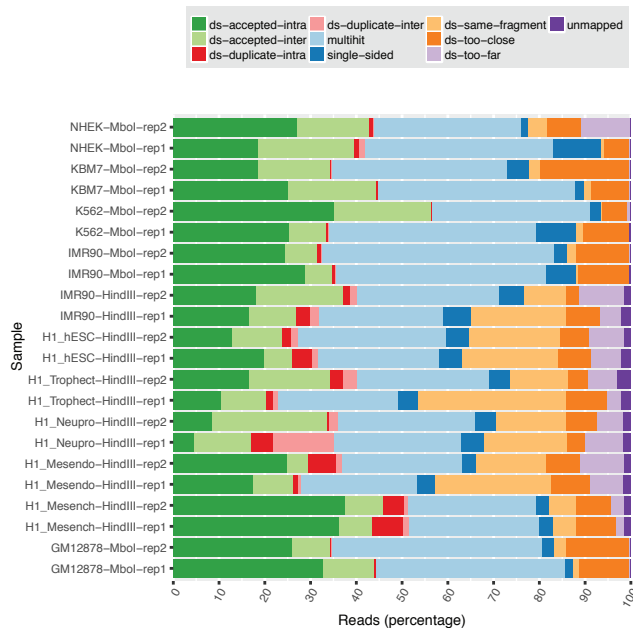

## Filtered

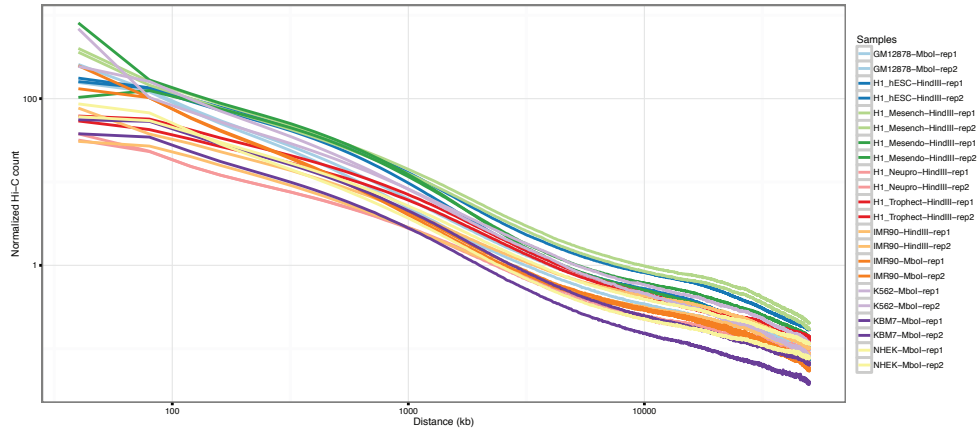

## IC

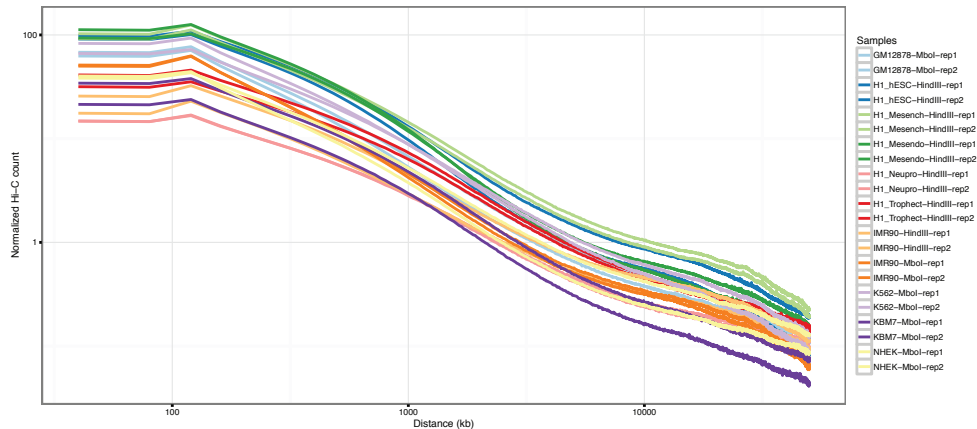

Filtered

IC

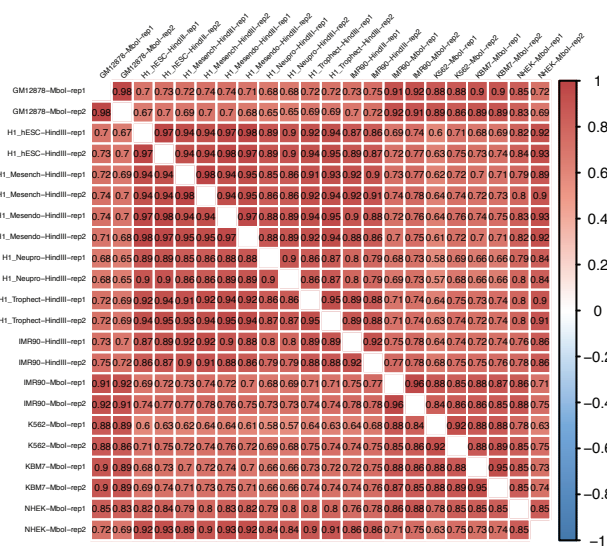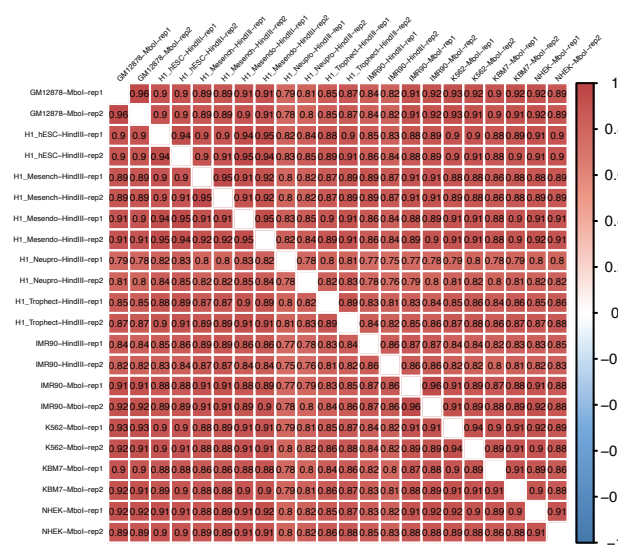

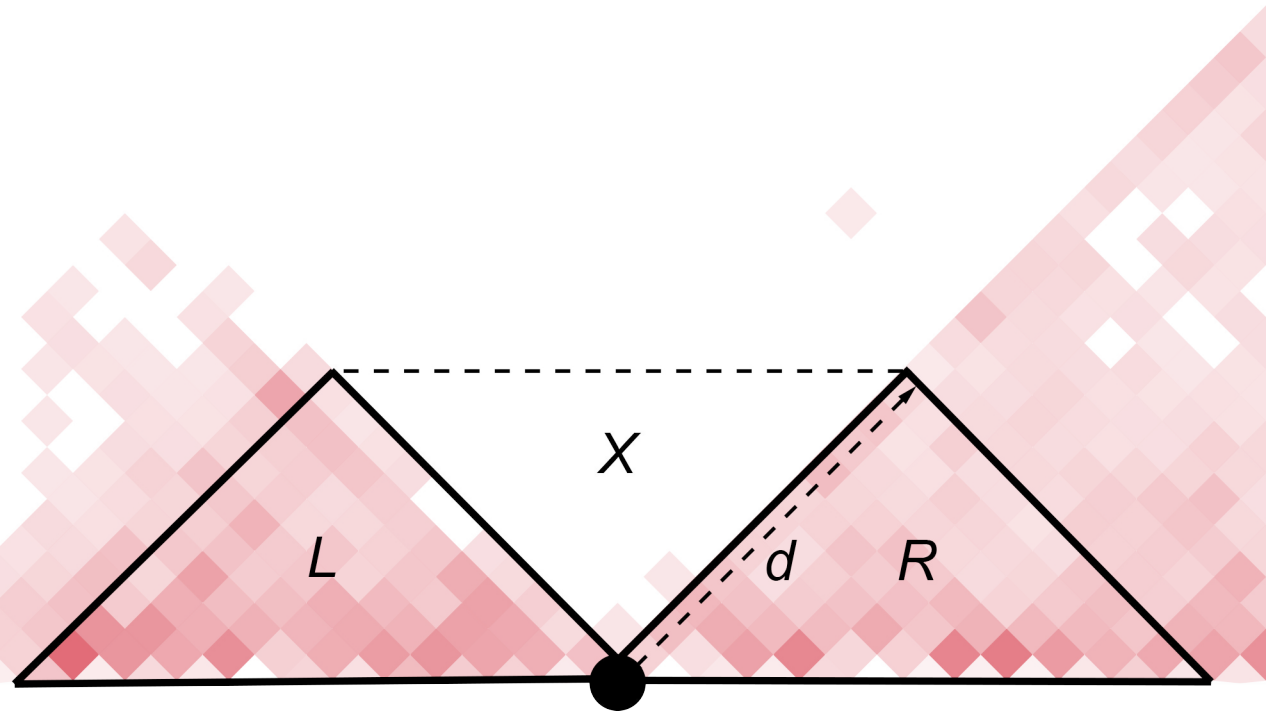

Filtered

Ratio

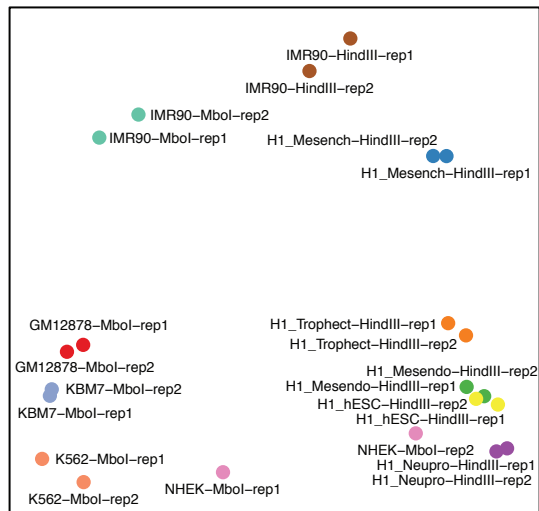

IC

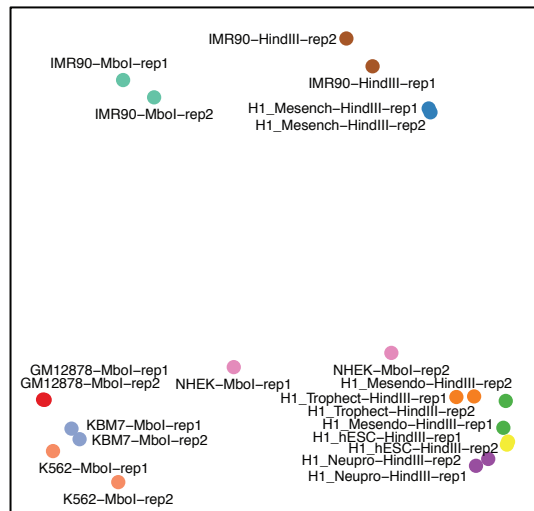

PC2  
PC1



Filtered

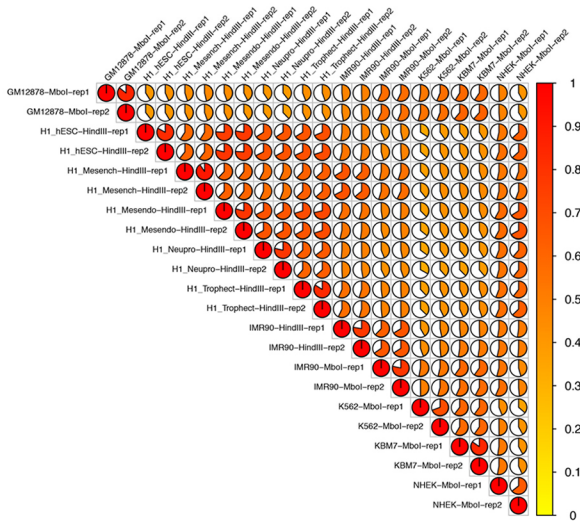

IC

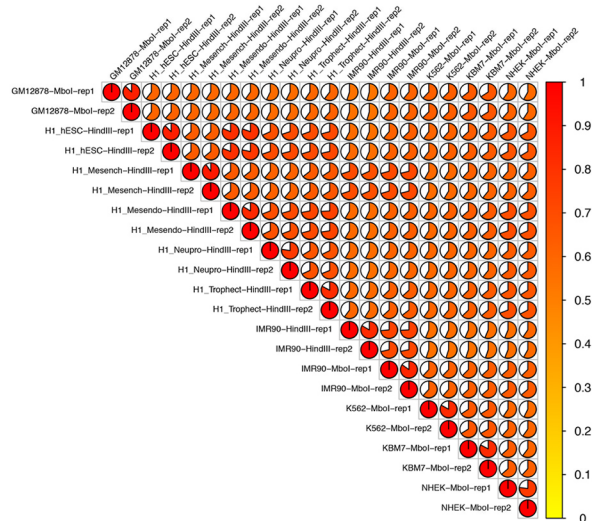

Filtered

IC

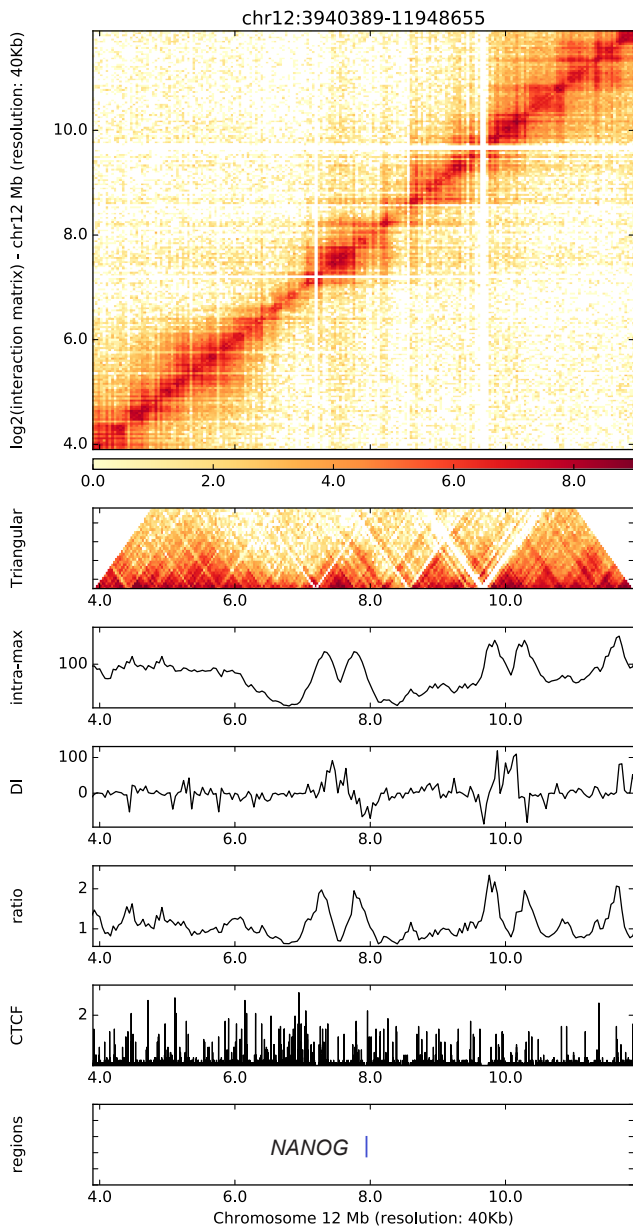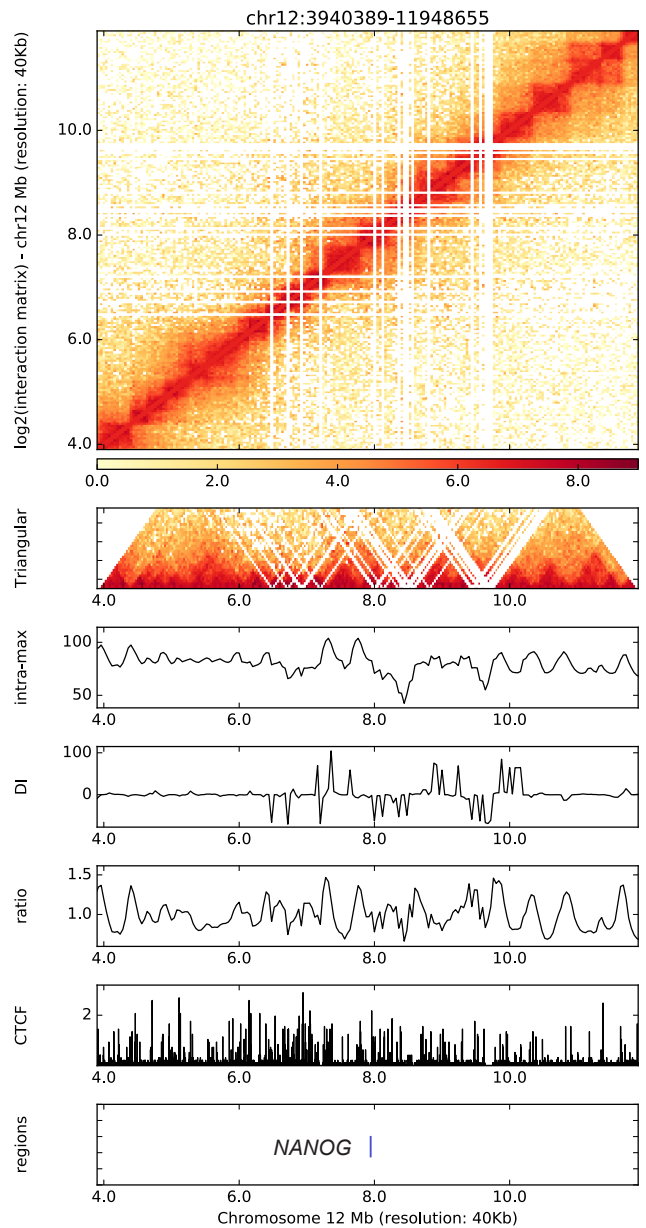

## IMR90 sample

## locus 2

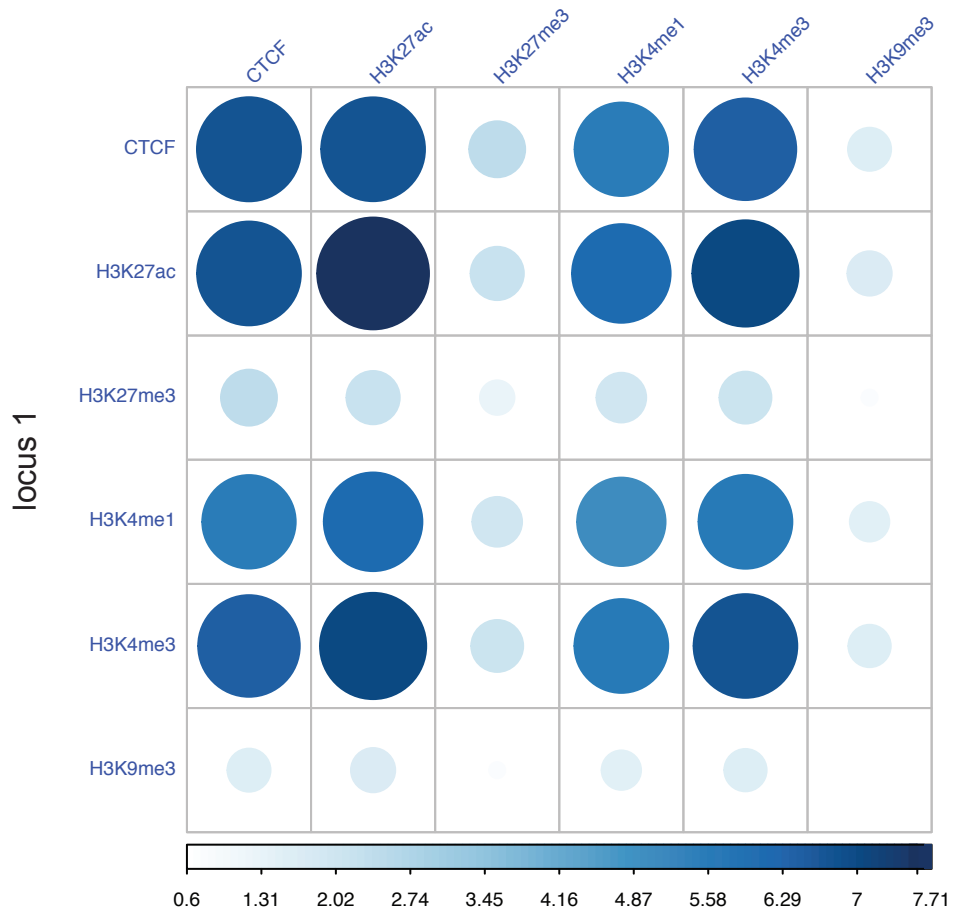

## H1 sample

## locus 2

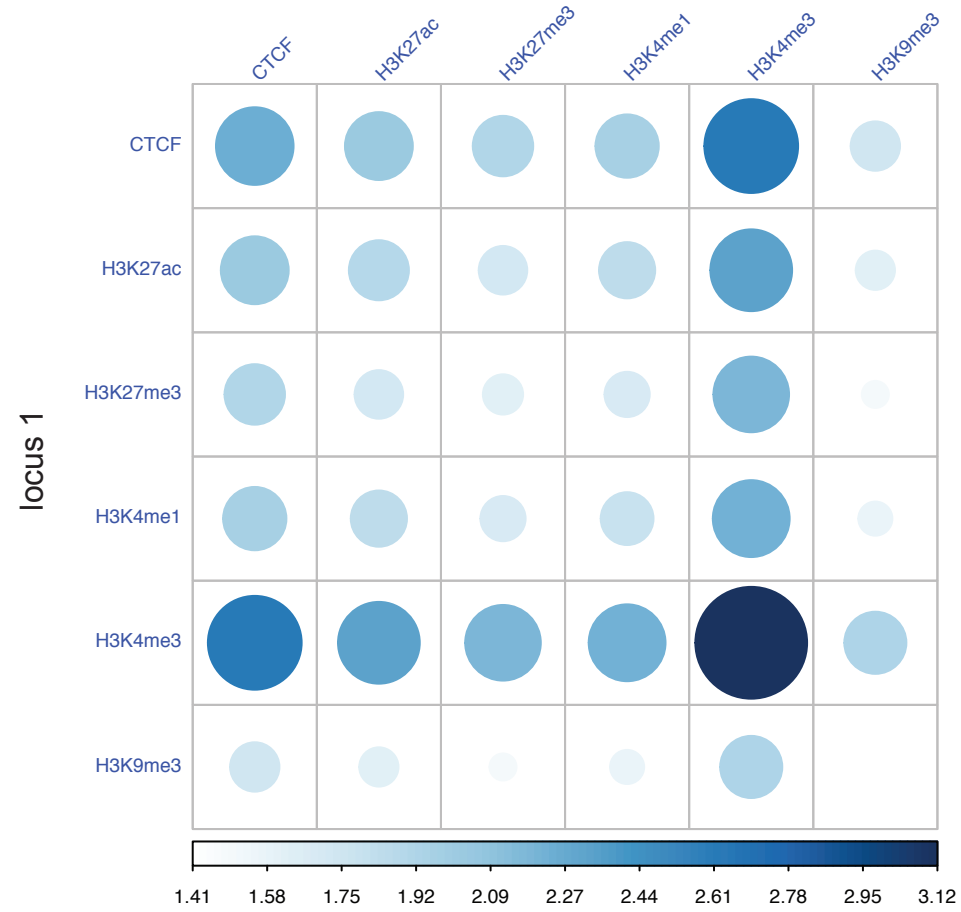

Source: http://biorxiv.org/content/10.1101/084954v1.full.pdf
